# Supplementary material for: Visible-light-mediated direct synthesis of phosphorotrithioates as potent anti-inflammatory agents from white phosphorus
Source: Royal Society of Chemistry journal article supplement (doi:10.1039/c8qo01087k), 2018-11-16
Supplement: c8qo01087k1.pdf [file c8qo01087k1.pdf]

## Electronic Supplementary Information

for

### Visible-light-mediated direct synthesis of phosphorotrithioates as potent anti-inflammatory agents from white phosphorus

Guozhang Lu,<sup>a</sup> Jun Chen,<sup>b</sup> Xinlei Huangfu,<sup>a</sup> Xueyan Li,<sup>a</sup> Meijuan Fang,<sup>b,\*</sup> Guo Tang,<sup>a,\*</sup> and Yufen Zhao<sup>a</sup>

<sup>a</sup> Department of Chemistry, College of Chemistry and Chemical Engineering, and the Key Laboratory for Chemical Biology of Fujian Province, Xiamen University, Xiamen, Fujian 361005, China; Fax: (86)592-2185780; E-mail: [t12g21@xmu.edu.cn](mailto:t12g21@xmu.edu.cn)

<sup>b</sup> School of Pharmaceutical Sciences and the Key Laboratory of Innovative Drug Target Research, Xiamen University, Xiamen, Fujian 361005, China; E-mail: [fangmj@xmu.edu.cn](mailto:fangmj@xmu.edu.cn)

#### Table of Contents

|         |                                         |
|---------|-----------------------------------------|
| S 2     | General Information                     |
| S 2     | Experimental Section                    |
| S 6- 10 | NMR Spectral Data                       |
| S 11-43 | NMR Spectra                             |
| S 44-50 | Crystallographic Spectrum for <b>3i</b> |

## General Information:

Reagents were purchased from commercial sources and used without further purification. Spectroscopy data of the known compounds matches with the data reported in the corresponding references.  $^1\text{H}$ ,  $^{13}\text{C}$ ,  $^{31}\text{P}$  and  $^{19}\text{F}$  NMR spectra were recorded on a Bruker Av 400 spectrometer using tetramethylsilane (TMS) in  $\text{CDCl}_3$  as the internal standard for  $^1\text{H}$ , and  $^{13}\text{C}$  NMR ( $^1\text{H}$  NMR: TMS at 0.00 ppm,  $\text{CHCl}_3$  at 7.26 ppm;  $^{13}\text{C}$  NMR:  $\text{CDCl}_3$  at 77.16 ppm) and 85%  $\text{H}_3\text{PO}_4$  as external standard for  $^{31}\text{P}$  NMR. Data are represented as follows: chemical shift, multiplicity (s = singlet, d = doublet, t = triplet, q = quartet, m = multiplet), coupling constants in hertz (Hz), integration. ESI mass spectra was acquired on a Bruker Dalton Esquire 3000 Plus mass spectrometer. The unknown products were further characterized by HRMS (FT-ICR-MS) and an electrospray ionization source in positive-ion mode. The products were purified by column chromatography on silica gel 300-400 mesh.

The impurity or residual solvents on the  $^1\text{H}$  NMR and  $^{13}\text{C}$  NMR spectra are trace of petroleum ether and AcOEt.

## Experimental section:

**General procedure for the synthesis of 3:** An oven-dried Schlenk tube containing  $\text{Na}_2\text{eosinY}$  (0.045 mmol, 0.05 equiv) was evacuated and purged with argon three times. Thiol (0.9 mmol, 1.0 equiv) and  $\text{P}_4$  (9.3 mg, 0.3 mmol, 1/3 equiv) in toluene (2.0 mL) was added to the system at room temperature. Then DMSO (0.5 mL) was added. The reaction mixture was stirred and irradiated by white LEDs (3 W) at room temperature under Ar atmosphere for 12 h. After completion,  $\text{H}_2\text{O}_2$  (0.5 mL) was added, and the mixture was extracted by EtOAc ( $3 \times 10.0$  mL). The combined organic layer was dried over anhydrous  $\text{Na}_2\text{SO}_4$ , filtered, and concentrated by rotary evaporation. The crude reaction mixture was purified by flash chromatography using petroleum ether–AcOEt [from 50:1 to 10:1 (v/v)] as the eluent to give the corresponding product.

### Reacting $\text{P}_4$ with disulfides:

We first attempted the coupling of  $\text{P}_4$  with diphenyl disulfide at 60 °C under an argon atmosphere, but no reaction was observed even after 20 hours (Table 1, entry 1). On irradiation

with white light (3 W LEDs, or 40 W CFL), the reaction afforded the corresponding triphenyl phosphorotrithioite **2** in 28% yield (Table 1, entry 1). In order to improve the conversion of  $P_4$  to  $P(SR)_3$ , 5 equivalents of disulfide were used, giving 85% conversion and an isolated yield of 83% (entry 2). Di-4-chlorophenyl disulfide could also give the corresponding product in good yield (entries 3 and 4). Di-*p*-bromophenyl disulphide, di-*p*-methoxyphenyl disulphide, di-*p*-tolyl disulfide and diphenyl diselenide were also examined. Unfortunately, only trace amounts of desired products were detected (Table 1, entries 5-8).

#### Reacting $P_4$ with disulfides<sup>a</sup>

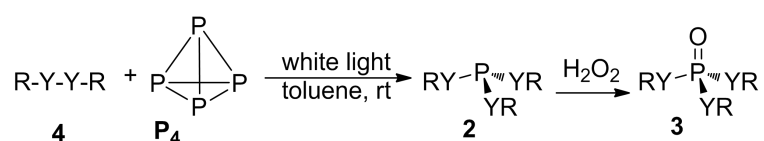

| entry | Y  | R                                  | n <sup>b</sup> | <b>2</b> /ppm (yield) | <b>3</b> , yield (%) <sup>c</sup> |
|-------|----|------------------------------------|----------------|-----------------------|-----------------------------------|
| 1     | S  | Ph                                 | 1.5            | 133.4 (28)            | (0) <sup>d</sup> , 28             |
| 2     | S  | Ph                                 | 3              | 133.4 (85)            | 83                                |
| 3     | S  | 4-ClC <sub>6</sub> H <sub>4</sub>  | 1.5            | 131.1 (32)            | 32                                |
| 4     | S  | 4-ClC <sub>6</sub> H <sub>4</sub>  | 3              | 131.1 (80)            | 80                                |
| 5     | S  | 4-MeOC <sub>6</sub> H <sub>4</sub> | 5              | -                     | 0                                 |
| 7     | S  | 4-BrC <sub>6</sub> H <sub>4</sub>  | 5              | -                     | 0                                 |
| 8     | Se | Ph                                 | 5              | complicated           | decomposed                        |

<sup>a</sup>Reaction conditions: (1) dichalcogenides,  $P_4$  (9.3 mg, 0.3 mmol), toluene (2.5 mL), irradiated with 3 W white LEDs at room temperature for 12 h under an argon atmosphere. (2) Oxidation with excess  $H_2O_2$  (30%, 1 mL), 1 hour, the yield was calculated via  $^{31}P$  NMR spectroscopy.  $^{31}P$  NMR chemical shift for the  $P(YR)_3$  product referenced to external 85%  $H_3PO_4$ . <sup>b</sup>Number of equivalents per phosphorus atom. <sup>c</sup>Isolated yield. <sup>d</sup>60 °C without light.

### Anti-inflammatory Activity in *Vitro*

The *in vitro* anti-inflammatory activities of the synthesized compounds were evaluated by using a LPS-stimulated inflammation model. The RAW264.7 cells (Cell Bank of Chinese Academy of Sciences) were pretreated with different concentrations of compound **3f** for 2 h, followed by LPS (100 ng·mL<sup>-1</sup>) stimulation for 3 hours at 37 °C., then were harvested for mRNA analysis with quantitative polymerase chain reaction (qPCR) assay. The cells were homogenized in TRIZOL kit (Yesen, Shanghai, China) for the extraction of total RNA according to each manufacturer's protocol. The resulting RNA was used as a template for generating first-strand cDNA synthesis using cDNA synthesis SuperMix Kit (Yesen, Shanghai, China). Gene specific PCR primers were provided by Brogene Biotechnology (Xiamen, China). The sequences of gene-specific PCR primers are listed in Table S1. An equal amount of GAPDH messenger RNA (mRNA) was used as an internal standard. The SYBR green PCR Master Mix (Yesen, Shanghai, China) was used for real-time PCR analysis. The expression levels relative to the GAPDH control were calculated with the 2<sup>-ΔΔCt</sup> method.

Table S1. List of qPCR primers

| Gene  | Forward Primer       | Reverse Primer       |
|-------|----------------------|----------------------|
| GAPDH | CCTTCCGTGTTCTACCC    | CAACCTGGTCCTCAGTGTAG |
| TNF-α | GAAGTGGCAGAAGAGGCACT | AGGGTCTGGGCCATAGAAGT |
| IL-1β | AGAGCATCCAGCTTCAAAT  | CATCTCGGAGCCTGTAGTG  |
| IL-6  | AGTTGCCTTCTTGGGACTGA | TCCACGATTTCCCAGAGAAC |

### MTT Assay for Cell Viability:

MTT was used to evaluate cell viability. RAW 264.7 cells were seeded at a density of 1×10<sup>4</sup> cells per well in a 96- well plate in RPMI 1640 medium and incubated at 37 °C overnight. The cells were treated in triplicate with vehicle alone or compound **3f** at different concentrations for 24 hours. MTT stock solution prepared in PBS was then added to each well to a final concentration of 0.5 mg/mL and incubated for 4 h at 37 °C. The supernatants were removed and resolved with DMSO (100 μL/well). The optical density of the samples was measured at 570 nm on a Microplate Reader (Thermo).

**Statistical analyses**

Student's t test was used to determine the differences between sets of data. Statistics were analyzed using GraphPad Prism 5(GraphPad, San Diego, CA, USA);  $p < 0.05$  was considered significant.

## Spectral data

*S,S,S*-Triphenyl Phosphorotrithioate (**3a**, CAS No. 13799-87-6)

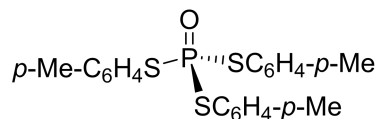

White solid. Yield: 65%. Mp: 130-133 °C. <sup>1</sup>H NMR (400 MHz, CDCl<sub>3</sub>): δ 7.43 - 7.40 (m, 6H), 7.14 (d, *J* = 8.47 Hz, 6H), 3.33(d, *J* = 2.5 Hz, 9H). <sup>13</sup>C NMR (100 MHz, CDCl<sub>3</sub>): δ 140.2 (d, *J* = 25.8 Hz), 135.8 (d, *J* = 4.5 Hz), 130.3 (d, *J* = 2.7 Hz), 123.4 (d, *J* = 7.3 Hz), 21.5. <sup>31</sup>P NMR (162 MHz, CDCl<sub>3</sub>): δ 56.7. HRMS calcd for C<sub>21</sub>H<sub>21</sub>NaOPS<sub>3</sub><sup>+</sup> [M+Na]<sup>+</sup> 439.0384, found 439.0384.

*S,S,S*-Tri-*m*-tolyl Phosphorotrithioate (**3b**, New Compound)

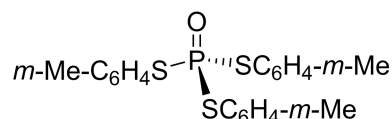

White solid. Yield: 50%. Mp: 50-51 °C. <sup>1</sup>H NMR (400 MHz, CDCl<sub>3</sub>): δ 7.36 - 7.32 (m, 6H), 7.26 - 7.19 (m, 6H), 2.33 (s, 9H) <sup>13</sup>C NMR (100 MHz, CDCl<sub>3</sub>): δ 139.3 (d, *J* = 2.5 Hz), 136.3 (d, *J* = 4.8 Hz), 132.8 (d, *J* = 24.8 Hz), 130.7 (d, *J* = 3.2 Hz), 129.2 (d, *J* = 2.2 Hz), 126.3 (d, *J* = 2.2 Hz), 21.4. <sup>31</sup>P NMR (162 MHz, CDCl<sub>3</sub>): δ 55.7. HRMS calcd for C<sub>21</sub>H<sub>21</sub>NaOPS<sub>3</sub><sup>+</sup> [M+Na]<sup>+</sup> 439.0384, found 439.0380.

*S,S,S*-Tri-*o*-tolyl Phosphorotrithioate (**3c**, CAS No. 35029-38-0)

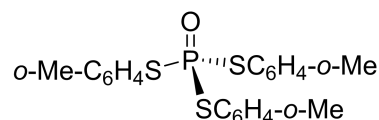

White solid. Yield: 40%. Mp: 55-56 °C. <sup>1</sup>H NMR (400 MHz, CDCl<sub>3</sub>): δ 7.48 - 7.46 (m, 3H), 7.21 - 7.18 (m, 3H), 7.15 - 7.14 (m, 3H), 7.07 (t, *J* = 7.8, 3H), 2.23 (d, *J* = 1.3 Hz, 9H). <sup>13</sup>C NMR (100 MHz, CDCl<sub>3</sub>): δ 143.5 (d, *J* = 4.8 Hz), 137.5 (d, *J* = 4.5 Hz), 131.1 (d, *J* = 2.7 Hz), 130.2 (d, *J* = 3.2 Hz), 126.7 (d, *J* = 2.8 Hz), 126.5 (d, *J* = 6.6 Hz), 21.6. <sup>31</sup>P NMR (162 MHz, CDCl<sub>3</sub>): δ 52.5. HRMS calcd for C<sub>21</sub>H<sub>21</sub>NaOPS<sub>3</sub><sup>+</sup> [M+Na]<sup>+</sup> 439.0384, found 439.0385.

*S,S,S*-Triphenyl Phosphorotrithioate (**3d**, CAS No. 597-82-1)

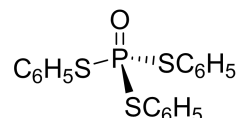

White solid. Yield: 60%. Mp: 110-113 °C. <sup>1</sup>H NMR (400 MHz, CDCl<sub>3</sub>): δ 7.54 - 7.51 (m, 6H), 7.40 - 7.37 (m, 3H), 7.35 - 7.32(m, 6H). <sup>13</sup>C NMR (100 MHz, CDCl<sub>3</sub>): δ 135.9 (d, *J* = 5.3 Hz), 129.9 (d, *J* = 3.2 Hz), 129.5 (d, *J* = 2.8 Hz), 126.8 (d, *J* = 6.4 Hz), 21.5. <sup>31</sup>P NMR (162 MHz, CDCl<sub>3</sub>): δ 55.5. HRMS calcd for C<sub>21</sub>H<sub>22</sub>OPS<sub>3</sub><sup>+</sup> [M+H]<sup>+</sup> 417.0565, found 417.0559.

*S,S,S*-Tris(4-(*tert*-butyl)phenyl) Phosphorotrithioate (**3e**, New Compound)

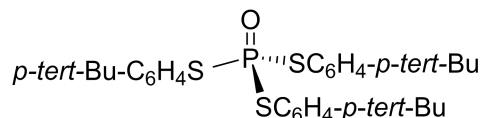

White solid. Yield: 55%. Mp: 100-103 °C. <sup>1</sup>H NMR (400 MHz, CDCl<sub>3</sub>): δ 7.46 - 7.43 (m, 6H), 7.36 - 7.35 (m, 6H), 1.31 (s, 27H) <sup>13</sup>C NMR (100 MHz, CDCl<sub>3</sub>): δ 153.2 (d, *J* = 3.7 Hz), 135.6 (d, *J* = 4.6 Hz), 126.6 (d, *J* = 2.6 Hz), 123.6 (d, *J* = 6.7 Hz), 35.0, 31.4. <sup>31</sup>P NMR (162 MHz, CDCl<sub>3</sub>): δ 56.4. HRMS calcd for C<sub>30</sub>H<sub>39</sub>NaOPS<sub>3</sub><sup>+</sup> [M+Na]<sup>+</sup> 565.1793, found 565.1786.

*S,S,S*-Tris(4-fluorophenyl) Phosphorotrithioate (**3f**, New Compound)

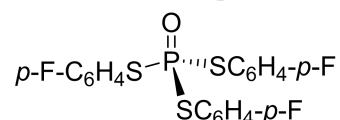

White solid. Yield: 80%. Mp: 101-103 °C. <sup>1</sup>H NMR (400 MHz, CDCl<sub>3</sub>): δ 7.51 - 7.47 (m, 6H), 7.06 (t, *J* = 8.3 Hz, 6H). <sup>13</sup>C NMR (100 MHz, CDCl<sub>3</sub>): δ 164.2 (dd, *J* = 252.1 Hz, *J* = 3.7 Hz), 138.0 (dd, *J* = 8.8 Hz, *J* = 4.5 Hz), 121.1 (dd, *J* = 6.0 Hz, *J* = 3.6 Hz), 116.8 (dd, *J* = 22.3 Hz, *J* = 2.7 Hz). <sup>31</sup>P NMR (162 MHz, CDCl<sub>3</sub>): δ 57.6. <sup>19</sup>F NMR (377 MHz, CDCl<sub>3</sub>) δ -111.2. HRMS calcd for C<sub>18</sub>H<sub>12</sub>F<sub>3</sub>NaOPS<sub>3</sub><sup>+</sup> [M+Na]<sup>+</sup> 450.9632, found 450.9627.

*S,S,S*-Tris(3-fluorophenyl) Phosphorotrithioate (**3g**, New Compound)

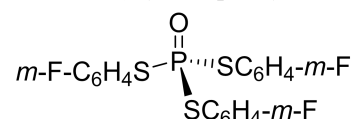

White solid. Yield: 60%. Mp: 116-119 °C. <sup>1</sup>H NMR (400 MHz, CDCl<sub>3</sub>): δ 7.37 - 7.32 (m, 6H), 7.28 - 7.25 (m, 3H), 7.15 - 7.11 (m, 3H). <sup>13</sup>C NMR (100 MHz, CDCl<sub>3</sub>): δ 162.6 (dd, *J* = 251.6 Hz, *J* = 3.4 Hz), 131.6 (dd, *J* = 5.4 Hz, *J* = 3.7 Hz), 130.9 (dd, *J* = 8.2 Hz, *J* = 2.7 Hz), 128.1 (t, *J* = 8.4 Hz), 122.6 (dd, *J* = 23.0 Hz, *J* = 4.5 Hz), 117.5 (dd, *J* = 20.9 Hz, *J* = 3.6 Hz). <sup>31</sup>P NMR (162 MHz, CDCl<sub>3</sub>): δ 53.6. <sup>19</sup>F NMR (377 MHz, CDCl<sub>3</sub>) δ -111.6. HRMS calcd for C<sub>18</sub>H<sub>12</sub>F<sub>3</sub>NaOPS<sub>3</sub><sup>+</sup> [M+Na]<sup>+</sup> 450.9632, found 450.9625.

*S,S,S*-Tris(2-fluorophenyl) Phosphorotrithioate (**3h**, New Compound)

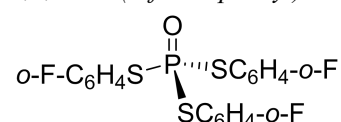

White solid. Yield: 45%. Mp: 75-77 °C. <sup>1</sup>H NMR (400 MHz, CDCl<sub>3</sub>): δ 7.60 (t, *J* = 6.8, 3H), 7.42 - 7.40 (m, 3H), 7.14 (t, *J* = 7.9, 6H). <sup>13</sup>C NMR (100 MHz, CDCl<sub>3</sub>): δ 163.0 (dd, *J* = 250.8 Hz, *J* = 5.0 Hz), 138.2 (d, *J* = 4.3 Hz), 132.6 (dd, *J* = 7.9 Hz, *J* = 3.0 Hz), 125.0, 116.6 (dd, *J* = 22.8 Hz, *J* = 2.5 Hz), 113.9 (dd, *J* = 18.1 Hz, *J* = 7.3 Hz). <sup>31</sup>P NMR (162 MHz, CDCl<sub>3</sub>): δ 54.2. <sup>19</sup>F NMR (377 MHz, CDCl<sub>3</sub>) δ -105.4. HRMS calcd for C<sub>18</sub>H<sub>12</sub>F<sub>3</sub>NaOPS<sub>3</sub><sup>+</sup> [M+Na]<sup>+</sup> 450.9632, found 450.9630.

*S,S,S*-Tris(4-chlorophenyl) Phosphorotrithioate (**3i**, CAS No. 35075-27-5)

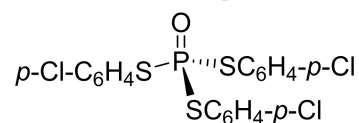

White solid. Yield: 65%. Mp: 119-121 °C. <sup>1</sup>H NMR (400 MHz, CDCl<sub>3</sub>): δ 7.43 (d, *J* = 8.0 Hz, 6H), 7.33 (d, *J* = 8.2 Hz, 6H). <sup>13</sup>C NMR (100 MHz, CDCl<sub>3</sub>): δ 137.0 (d, *J* = 4.5 Hz), 136.9 (d, *J* = 4.3 Hz), 129.9 (d, *J* = 6.6 Hz), 124.8 (d, *J* = 7.3 Hz). <sup>31</sup>P NMR (162 MHz, CDCl<sub>3</sub>): δ 52.8. HRMS

calcd for C<sub>18</sub>H<sub>12</sub>Cl<sub>3</sub>NaOPS<sub>3</sub><sup>+</sup> [M+Na]<sup>+</sup> 498.8746, found 498.8739.

*S,S,S*-Tris(3-chlorophenyl) Phosphorotrithioate(**3j**, New Compound)

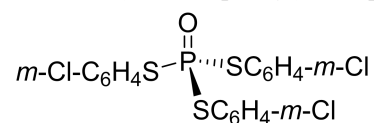

White solid. Yield: 47%. Mp: 65-67 °C. <sup>1</sup>H NMR (400 MHz, CDCl<sub>3</sub>): δ 7.50 (s, 3H), 7.44 - 7.39 (m, 6H), 7.30 (t, *J* = 7.9, 3H). <sup>13</sup>C NMR (100 MHz, CDCl<sub>3</sub>): δ 135.3 (d, *J* = 4.7 Hz), 135.2 (d, *J* = 3.2 Hz), 133.9 (d, *J* = 5.1 Hz), 130.6 (d, *J* = 2.8 Hz), 130.5 (d, *J* = 2.6 Hz), 128.0 (d, *J* = 6.9 Hz). <sup>31</sup>P NMR (162 MHz, CDCl<sub>3</sub>): δ 52.8. HRMS calcd for C<sub>18</sub>H<sub>12</sub>Cl<sub>3</sub>NaOPS<sub>3</sub><sup>+</sup> [M+Na]<sup>+</sup> 498.8746, found 498.8742.

*S,S,S*-Tris(2-chlorophenyl) Phosphorotrithioate(**3k**, New Compound)

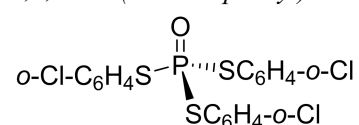

White solid. Yield: 45%. Mp: 78-80 °C. <sup>1</sup>H NMR (400 MHz, CDCl<sub>3</sub>): δ 7.71 (d, *J* = 8.1 Hz, 3H), 7.45 (d, *J* = 8.2 Hz, 3H), 7.32 (t, *J* = 7.6, 3H), 7.32 (t, *J* = 7.7, 3H). <sup>13</sup>C NMR (100 MHz, CDCl<sub>3</sub>): δ 139.3 (d, *J* = 5.5 Hz), 138.1 (d, *J* = 4.1 Hz), 131.4 (d, *J* = 3.1 Hz), 130.6 (d, *J* = 2.8 Hz), 127.5 (d, *J* = 2.6 Hz), 126.3 (d, *J* = 6.9 Hz). <sup>31</sup>P NMR (162 MHz, CDCl<sub>3</sub>): δ 51.6. HRMS calcd for C<sub>18</sub>H<sub>13</sub>Cl<sub>3</sub>OPS<sub>3</sub><sup>+</sup> [M+H]<sup>+</sup> 476.8926, found 476.8916.

*S,S,S*-Tris(3-bromophenyl) Phosphorotrithioate(**3l**, New Compound)

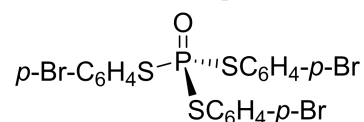

White solid. Yield: 50%. Mp: 132-134 °C. <sup>1</sup>H NMR (400 MHz, CDCl<sub>3</sub>): δ 7.49 (d, *J* = 8.4 Hz, 6H), 7.36 (d, *J* = 7.8 Hz, 6H). <sup>13</sup>C NMR (100 MHz, CDCl<sub>3</sub>): δ 137.2 (d, *J* = 5.1 Hz), 132.8 (d, *J* = 2.5 Hz), 125.4 (d, *J* = 7.2 Hz), 125.2 (d, *J* = 4.0 Hz). <sup>31</sup>P NMR (162 MHz, CDCl<sub>3</sub>): δ 53.6. HRMS calcd for C<sub>18</sub>H<sub>12</sub>Br<sub>3</sub>NaOPS<sub>3</sub><sup>+</sup> [M+Na]<sup>+</sup> 630.7230, found 630.7224.

*S,S,S*-Tris(3-bromophenyl) Phosphorotrithioate(**3m**, New Compound)

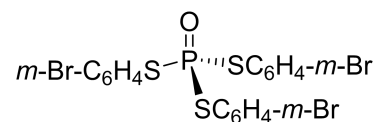

White solid. Yield: 45%. Mp: 78-80 °C. <sup>1</sup>H NMR (400 MHz, CDCl<sub>3</sub>): δ 7.65 – 7.64 (m, 3H), 7.57 – 7.55 (m, 3H), 7.47 (d, *J* = 7.7, 3H), 7.26 – 7.23 (m, 3H). <sup>13</sup>C NMR (100 MHz, CDCl<sub>3</sub>): δ 138.0 (d, *J* = 5.3 Hz), 134.3 (d, *J* = 4.4 Hz), 133.4 (d, *J* = 2.7 Hz), 130.8, 128.2 (d, *J* = 6.9 Hz), 123.1 (d, *J* = 3.6 Hz). <sup>31</sup>P NMR (162 MHz, CDCl<sub>3</sub>): δ 54.2. HRMS calcd for C<sub>18</sub>H<sub>13</sub>Br<sub>3</sub>OPS<sub>3</sub><sup>+</sup> [M+H]<sup>+</sup> 608.7411, found 608.7412.

*S,S,S*-Tris(4-methoxyphenyl) Phosphorotrithioate(**3n**, New Compound)



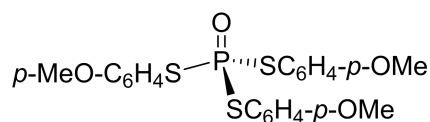

White solid. Yield: 60%. Mp: 142-143 °C. <sup>1</sup>H NMR (400 MHz, CDCl<sub>3</sub>): δ 7.44 (d, *J* = 7.8 Hz, 6H), 6.88 (d, *J* = 8.7 Hz, 6H), 3.81 (s, 9H). <sup>13</sup>C NMR (100 MHz, CDCl<sub>3</sub>): δ 161.2 (d, *J* = 3.4 Hz), 137.6 (d, *J* = 4.1 Hz), 117.2 (d, *J* = 7.3 Hz), 115.1 (d, *J* = 2.3 Hz), 55.6. <sup>31</sup>P NMR (162 MHz, CDCl<sub>3</sub>): δ 57.7. HRMS calcd for C<sub>21</sub>H<sub>22</sub>O<sub>4</sub>PS<sub>3</sub><sup>+</sup> [M+H]<sup>+</sup> 465.0412, found 465.0403.

*S,S,S*-Tris(3-methoxyphenyl) Phosphorotrithioate(**3o**, New Compound)

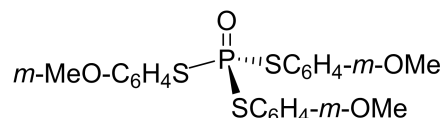

White solid. Yield: 55%. Mp: 76-78 °C. <sup>1</sup>H NMR (400 MHz, CDCl<sub>3</sub>): δ 7.26 - 7.24 (m, 3H), 7.14 - 7.12 (m, 3H), 7.10 - 7.09 (m, 3H), 6.95 - 6.92 (m, 3H), 3.81 (s, 9H). <sup>13</sup>C NMR (100 MHz, CDCl<sub>3</sub>): δ 160.6 (d, *J* = 2.8 Hz), 130.2 (d, *J* = 2.7 Hz), 128.0 (d, *J* = 4.6 Hz), 127.9 (d, *J* = 7.3 Hz), 120.5 (d, *J* = 4.5 Hz), 116.4 (d, *J* = 3.2 Hz), 55.6. <sup>31</sup>P NMR (162 MHz, CDCl<sub>3</sub>): δ 55.1. HRMS calcd for C<sub>21</sub>H<sub>22</sub>O<sub>4</sub>PS<sub>3</sub><sup>+</sup> [M+H]<sup>+</sup> 465.0412, found 465.0403.

*S,S,S*-Tris(4-(trifluoromethyl)phenyl) Phosphorotrithioate(**3p**, New Compound)

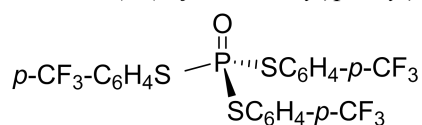

Wax. Yield: 75%. <sup>1</sup>H NMR (400 MHz, CDCl<sub>3</sub>): δ 7.66 - 7.60 (m, 3H), 7.58- 7.54 (m, 9H). <sup>13</sup>C NMR (100 MHz, CDCl<sub>3</sub>): δ 141.0, 135.9 (d, *J* = 5.4 Hz), 129.7 (q, *J* = 32.4 Hz), 126.8, 126.3 (q, *J* = 3.5 Hz), 124.1 (q, *J* = 272.5 Hz). <sup>31</sup>P NMR (162 MHz, CDCl<sub>3</sub>): δ 51.2. <sup>19</sup>F NMR (377 MHz, CDCl<sub>3</sub>) δ -62.7. HRMS Calcd for C<sub>21</sub>H<sub>12</sub>F<sub>9</sub>NaOPS<sub>3</sub><sup>+</sup> [M+Na]<sup>+</sup> 600.9635, found 600.9632.

*S,S,S*-Tri(thiophen-2-yl) Phosphorotrithioate(**3r**, New Compound)

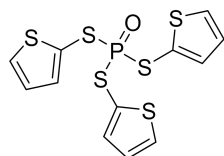

Wax. Yield: 35%. <sup>1</sup>H NMR (400 MHz, CDCl<sub>3</sub>): δ 7.55 - 7.54 (m, 3H), 7.36 - 7.34 (m, 3H), 7.11 - 7.08 (m, 3H). <sup>13</sup>C NMR (100 MHz, CDCl<sub>3</sub>): δ 138.5 (d, *J* = 6.3 Hz), 133.1 (d, *J* = 5.3 Hz), 128.4 (d, *J* = 3.7 Hz), 121.1 (d, *J* = 7.4 Hz). <sup>31</sup>P NMR (162 MHz, CDCl<sub>3</sub>): δ 59.1. HRMS calcd for C<sub>12</sub>H<sub>10</sub>OPS<sub>6</sub><sup>+</sup> [M+H]<sup>+</sup> 392.8788, found 392.8790.

*S,S,S*-Tri(naphthalen-2-yl) Phosphorotrithioate(**3s**, CAS No. 14974-75-5)

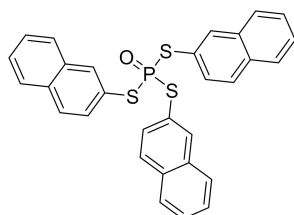

White solid. Yield: 45%. Mp: 193-196 °C. <sup>1</sup>H NMR (400 MHz, CDCl<sub>3</sub>): δ 8.0 (s, 3H), 7.86 - 7.81 (m, 9H), 7.62 – 7.50 (m, 9H). <sup>13</sup>C NMR (100 MHz, CDCl<sub>3</sub>): δ 136.1 (d, *J* = 6.8 Hz), 133.7 (d, *J* = 2.9 Hz), 133.6 (d, *J* = 2.1 Hz), 131.9 (d, *J* = 3.65 Hz), 129.1 (d, *J* = 1.5 Hz), 128.2, 127.9, 127.6, 126.9, 124.1 (d, *J* = 7.6 Hz). <sup>31</sup>P NMR (162 MHz, CDCl<sub>3</sub>): δ 54.3. HRMS calcd for C<sub>30</sub>H<sub>22</sub>OPS<sub>3</sub><sup>+</sup> [M+H]<sup>+</sup> 525.0565, found 525.0556.

*S,S,S-Tri([1,1'-biphenyl]-4-yl) Phosphorotrithioate (3t, New Compound)*

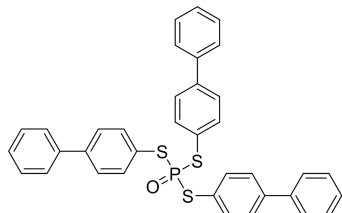

White solid. Yield: 50%. Mp: 145-147 °C. <sup>1</sup>H NMR (400 MHz, CDCl<sub>3</sub>): δ 7.64 (d, *J* = 8.5 Hz, 6H), 7.58 (d, *J* = 7.8 Hz, 12H), 7.44 (t, *J* = 7.5 Hz, 6H), 7.37 (d, *J* = 8.0 Hz, 3H). <sup>13</sup>C NMR (100 MHz, CDCl<sub>3</sub>): δ 142.9 (d, *J* = 3.8 Hz), 140.1, 136.2 (d, *J* = 4.7 Hz), 129.1, 128.2 (d, *J* = 2.6 Hz), 128.1, 127.4, 125.6 (d, *J* = 6.9 Hz). <sup>31</sup>P NMR (162 MHz, CDCl<sub>3</sub>): δ 53.6. HRMS calcd for C<sub>36</sub>H<sub>28</sub>OPS<sub>3</sub><sup>+</sup> [M+H]<sup>+</sup> 603.1034, found 603.1030.

*Tris(4-methoxyphenyl) Phosphorotrithioate (2n, New Compound)*

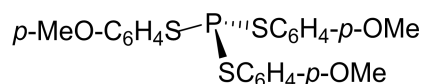

White solid. Yield: 40%. Mp: 86-89 °C. <sup>1</sup>H NMR (400 MHz, CDCl<sub>3</sub>): δ 7.41 (d, *J* = 8.3 Hz, 6H), 6.83 (d, *J* = 8.7 Hz, 6H), 3.79 (s, 9H). <sup>13</sup>C NMR (100 MHz, CDCl<sub>3</sub>): δ 160.3 (d, *J* = 1.8 Hz), 136.3 (d, *J* = 3.6 Hz), 122.7 (d, *J* = 13.1 Hz), 114.9, 55.5. <sup>31</sup>P NMR (162 MHz, CDCl<sub>3</sub>): δ 135.1. HRMS calcd for C<sub>21</sub>H<sub>21</sub>NaO<sub>3</sub>PS<sub>3</sub><sup>+</sup> [M+Na]<sup>+</sup> 471.0283, found 471.0273.

*1,2-Di-p-tolyldisulfane (1a, CAS No. 103-19-5)*

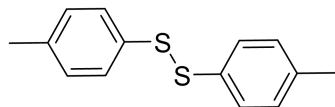

White solid. Yield: 35%. Mp: 42-44 °C. <sup>1</sup>H NMR (400 MHz, CDCl<sub>3</sub>): δ 7.40 (d, *J* = 7.7 Hz, 4H), 7.11 (d, *J* = 8.2 Hz, 4H), 2.33 (s, 6H). <sup>13</sup>C NMR (100 MHz, CDCl<sub>3</sub>): δ 137.6, 134.1, 129.9, 128.7, 21.3.

# NMR spectra

## <sup>1</sup>H NMR of 3a

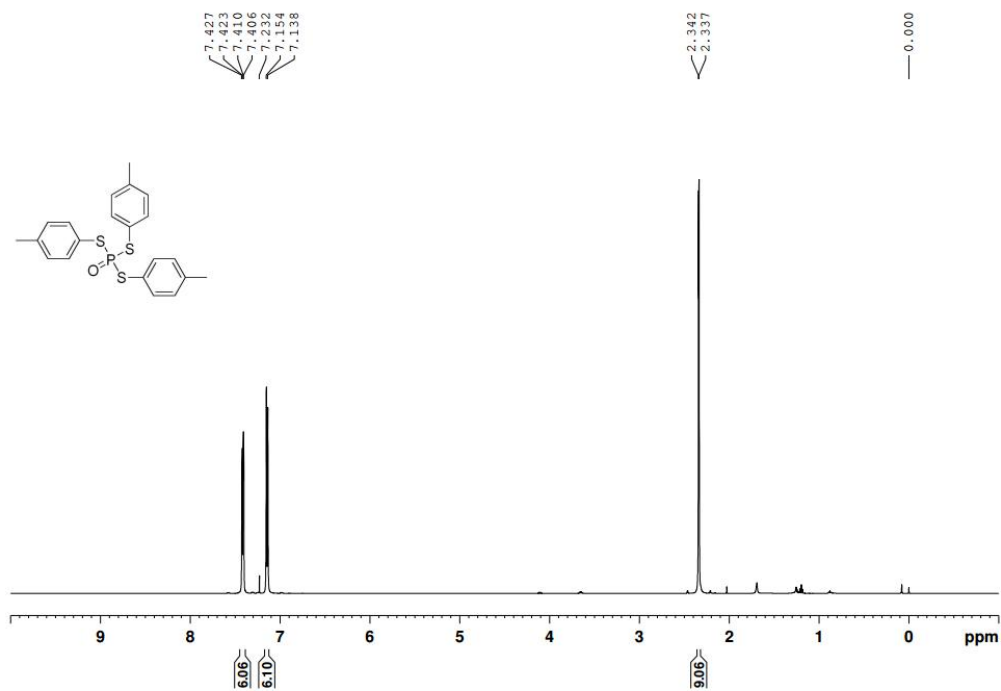

## <sup>13</sup>C NMR of 3a

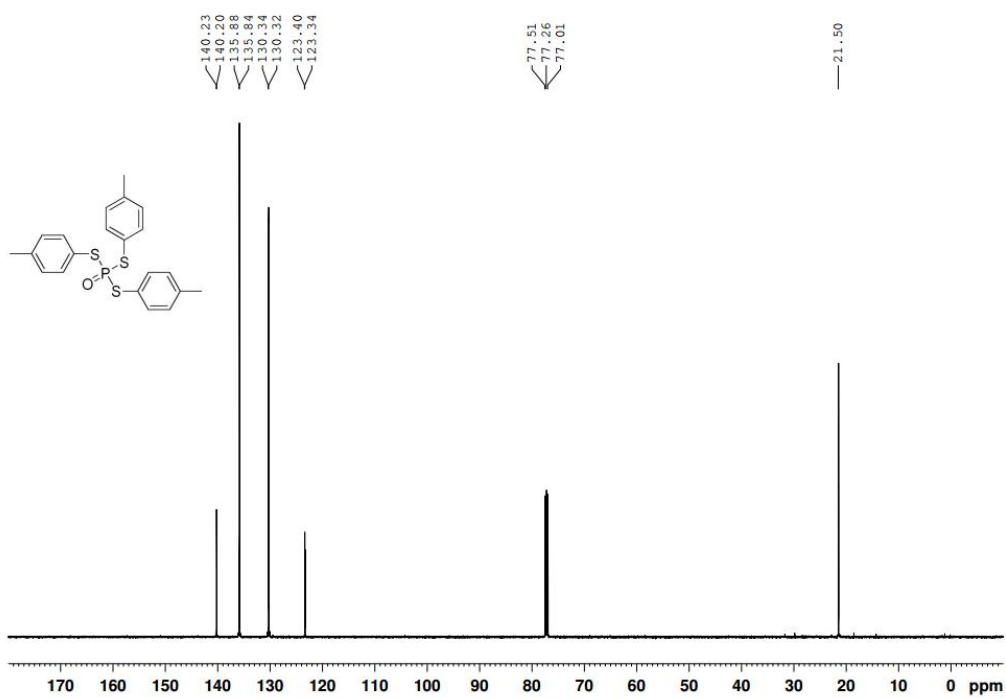

**<sup>31</sup>P NMR of 3a**

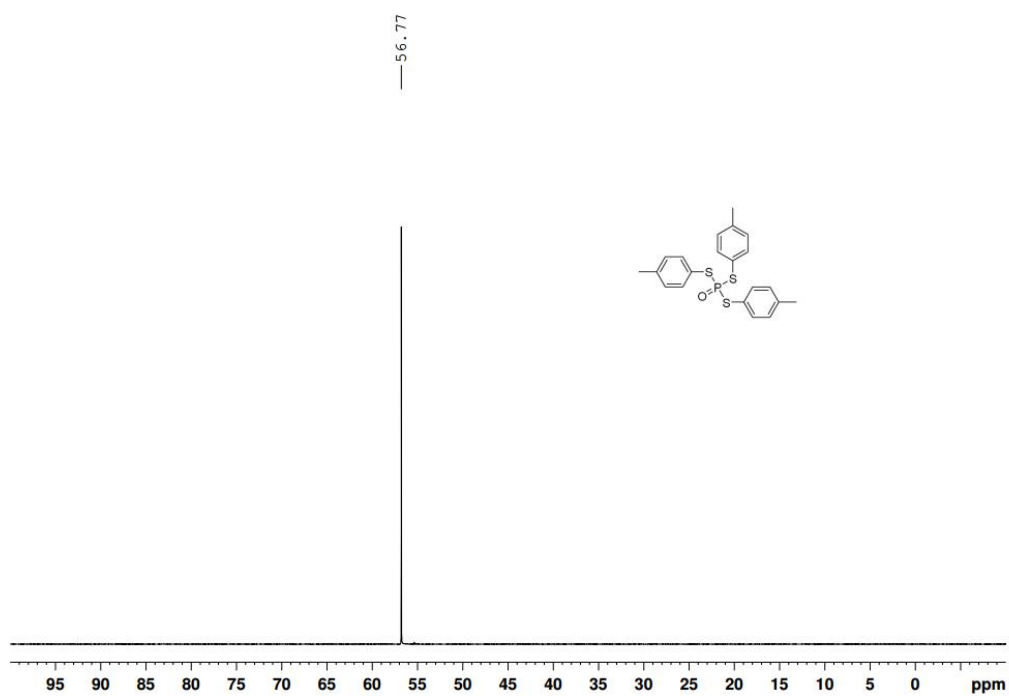

**<sup>1</sup>H NMR of 3b**

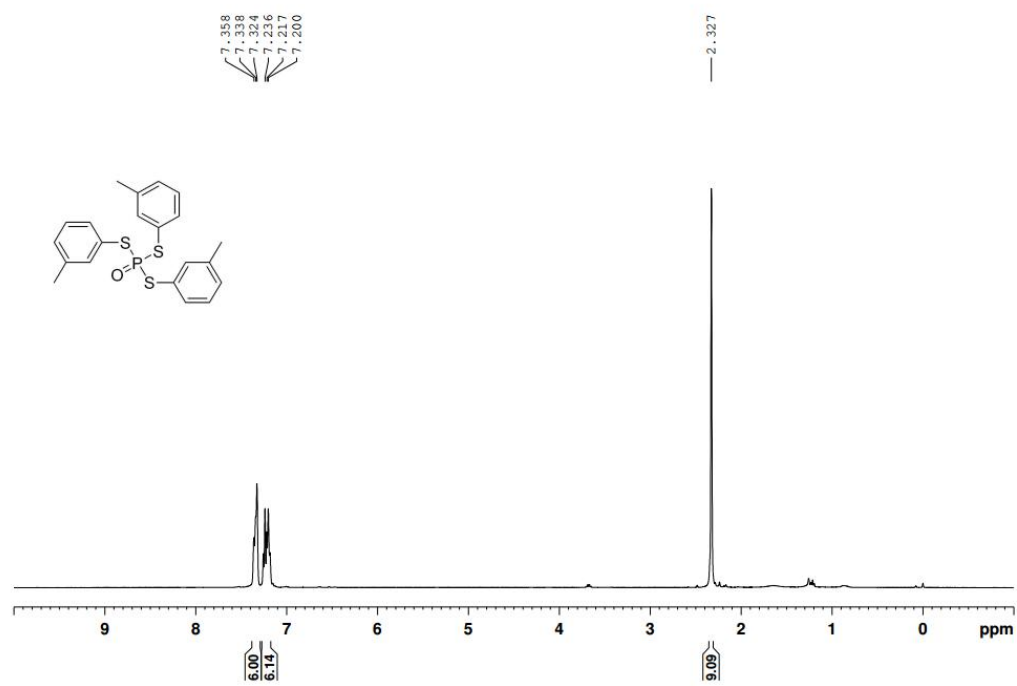

### <sup>13</sup>C NMR of 3b

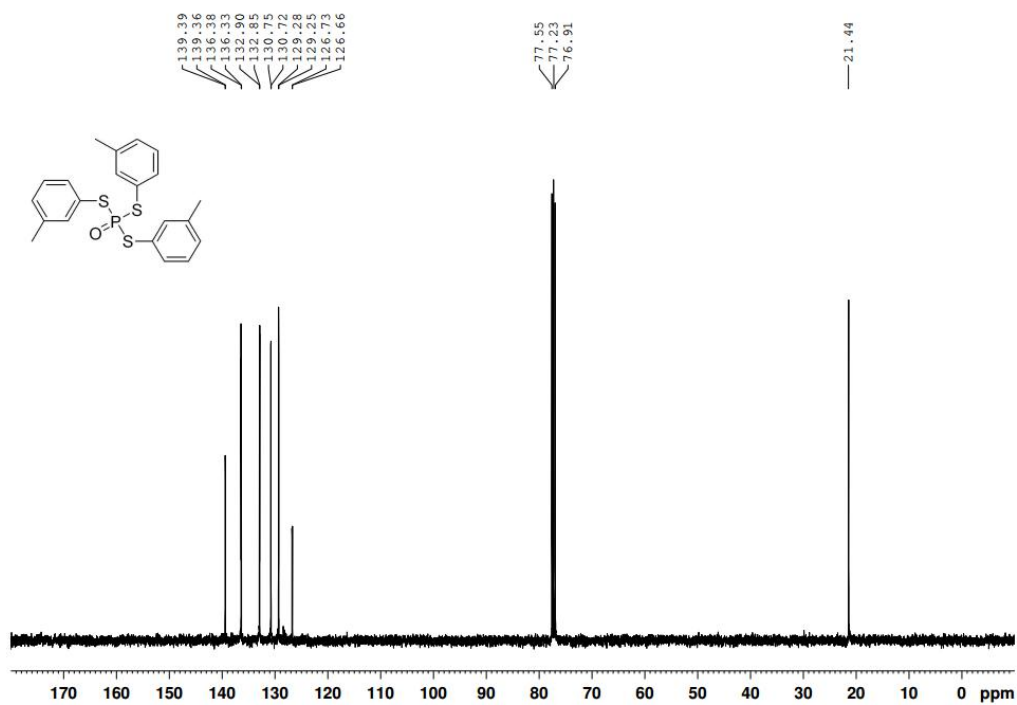

### <sup>31</sup>P NMR of 3b

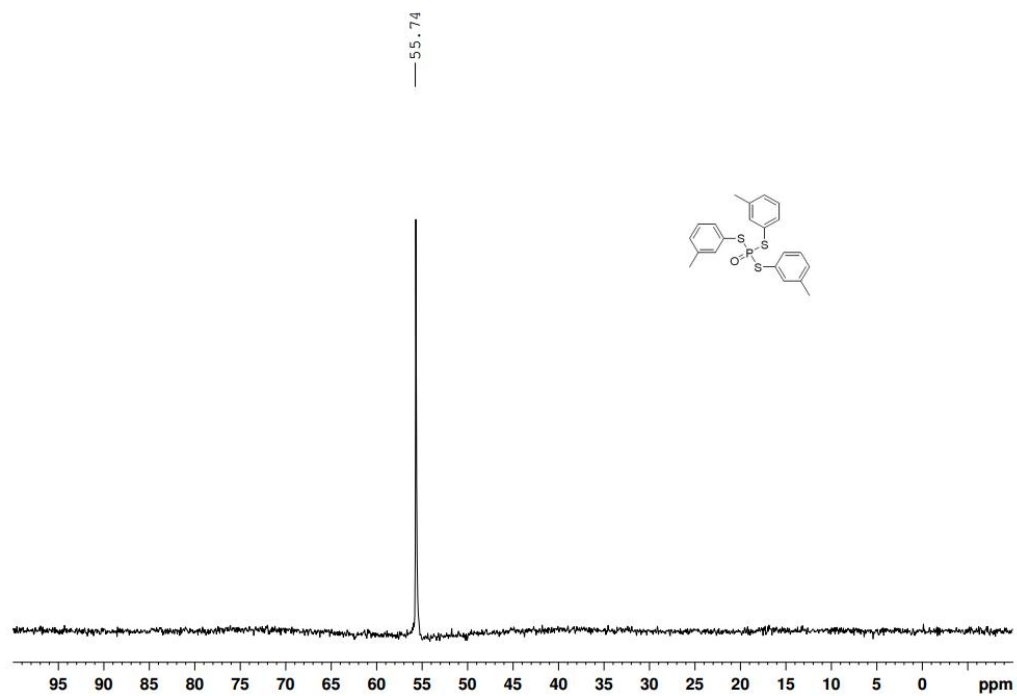

### <sup>1</sup>H NMR of 3c

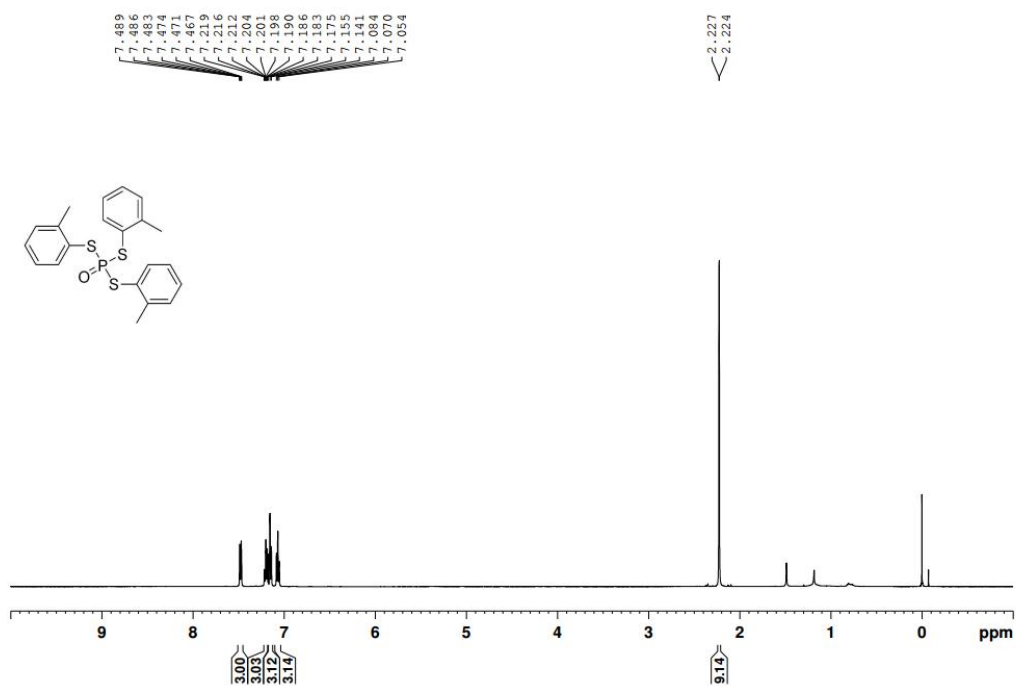

### <sup>13</sup>C NMR of 3c

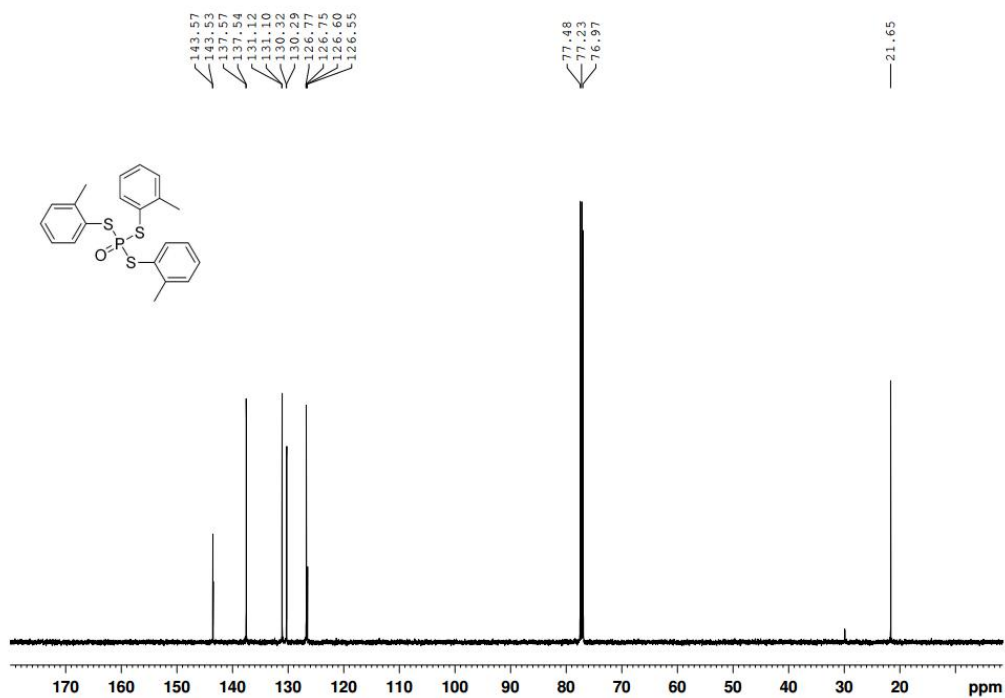

**<sup>31</sup>P NMR of 3c**

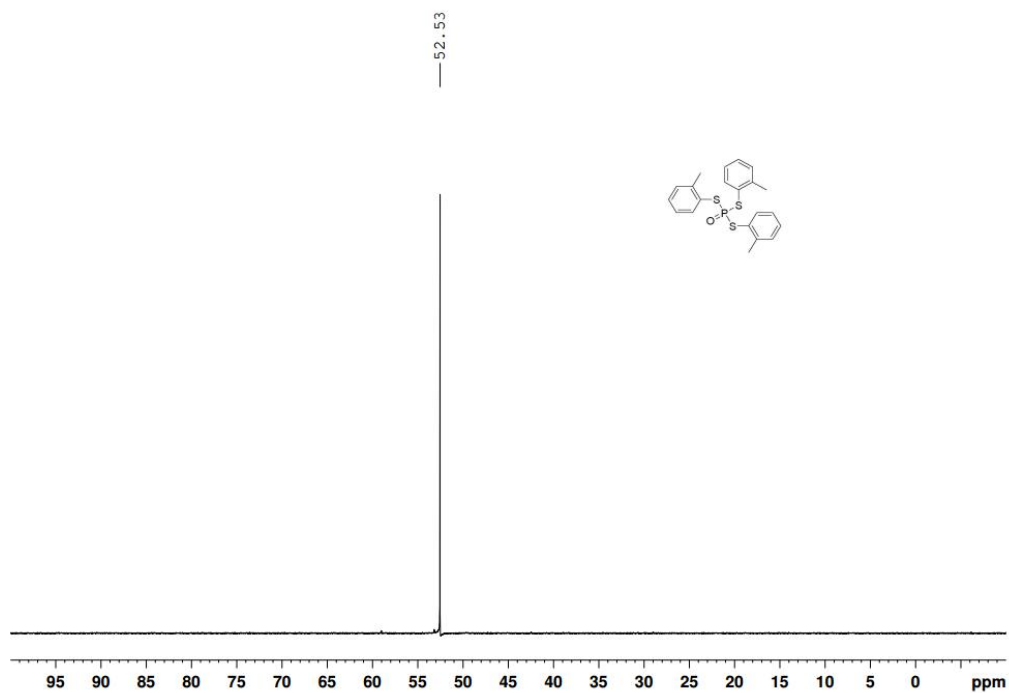

**<sup>1</sup>H NMR of 3d**

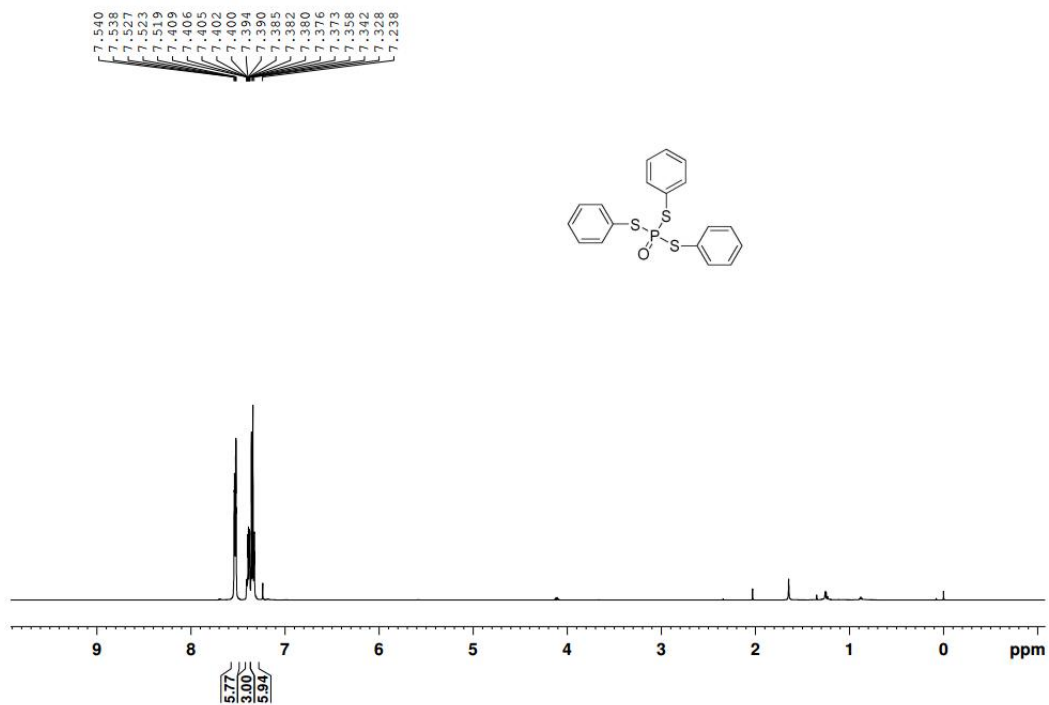

**<sup>13</sup>C NMR of 3d**

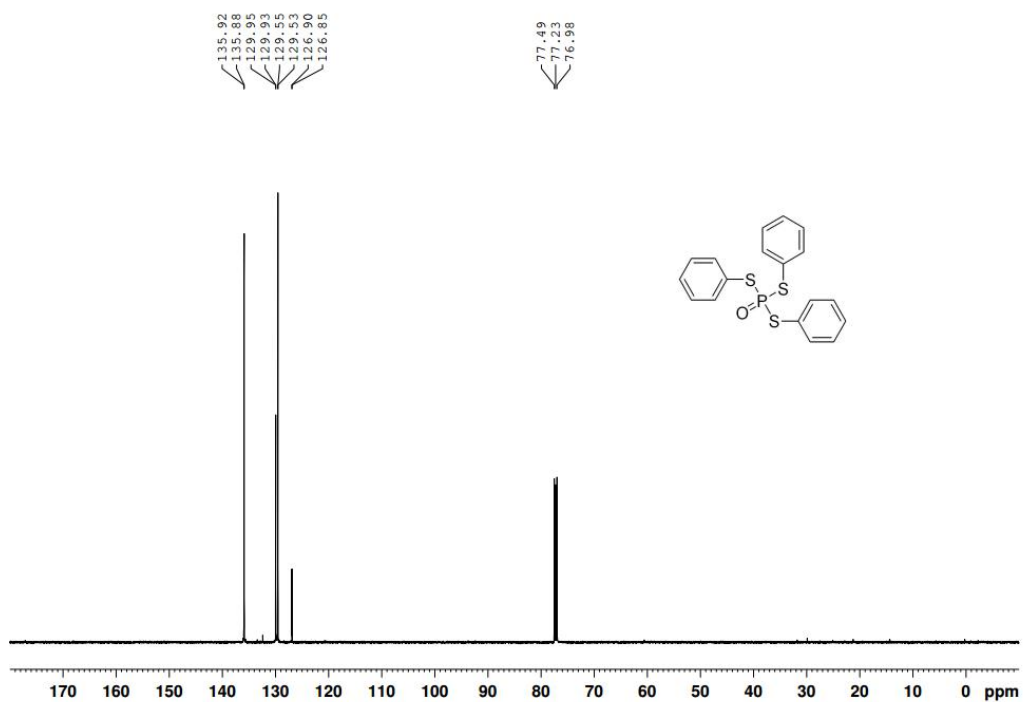

**<sup>31</sup>P NMR of 3d**

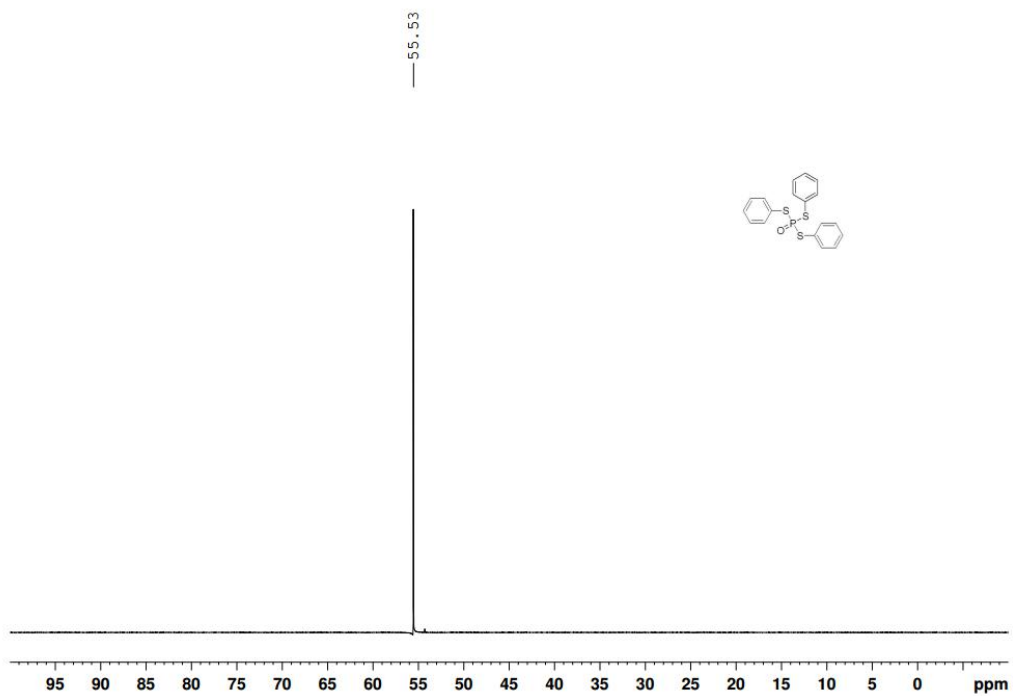



### <sup>1</sup>H NMR of 3e

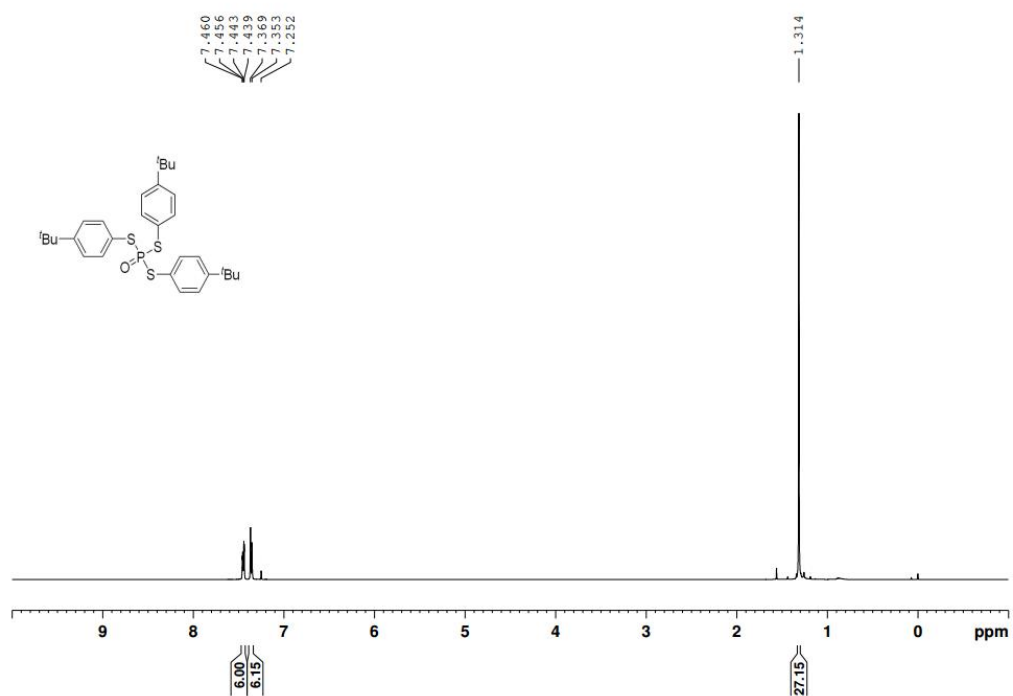

### <sup>13</sup>C NMR of 3e

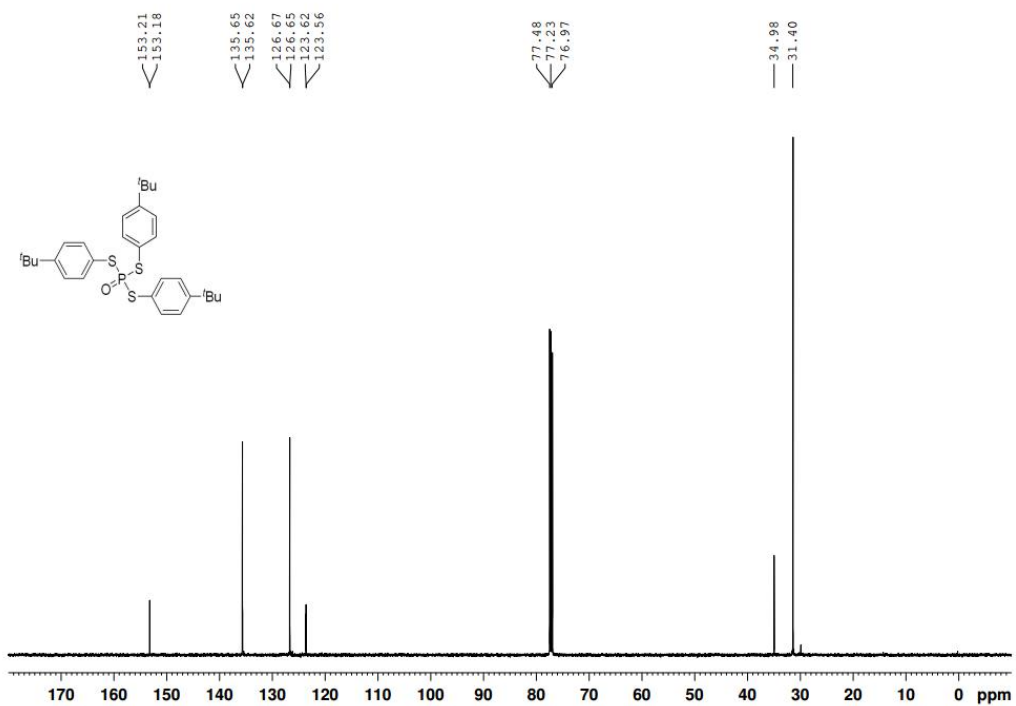

**<sup>31</sup>P NMR of 3e**

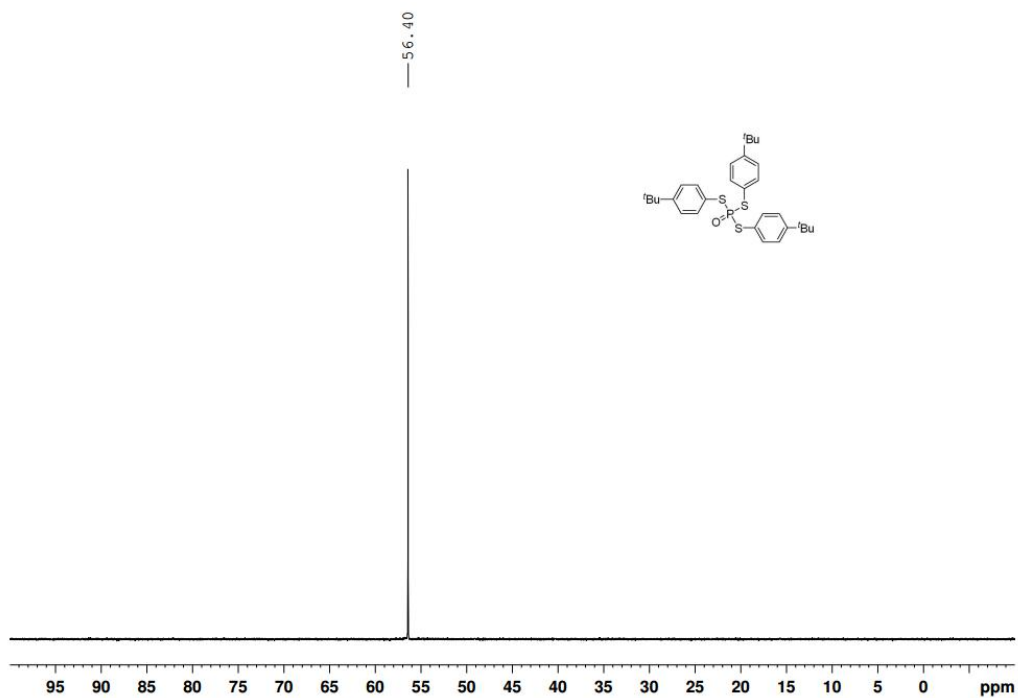

**<sup>1</sup>H NMR of 3f**

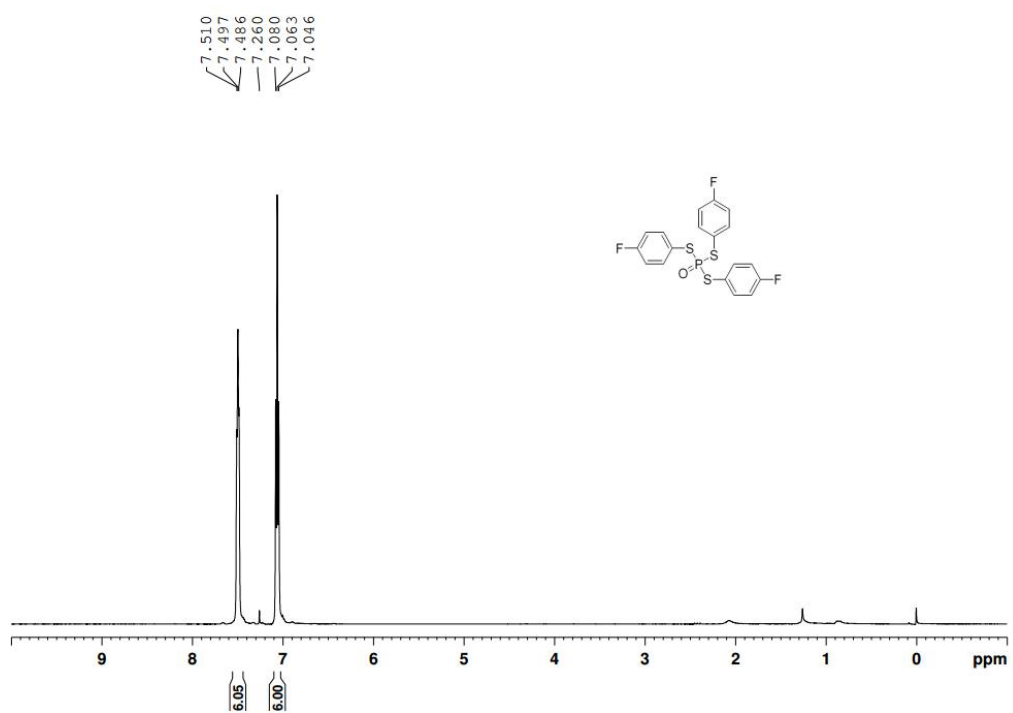

### <sup>13</sup>C NMR of 3f

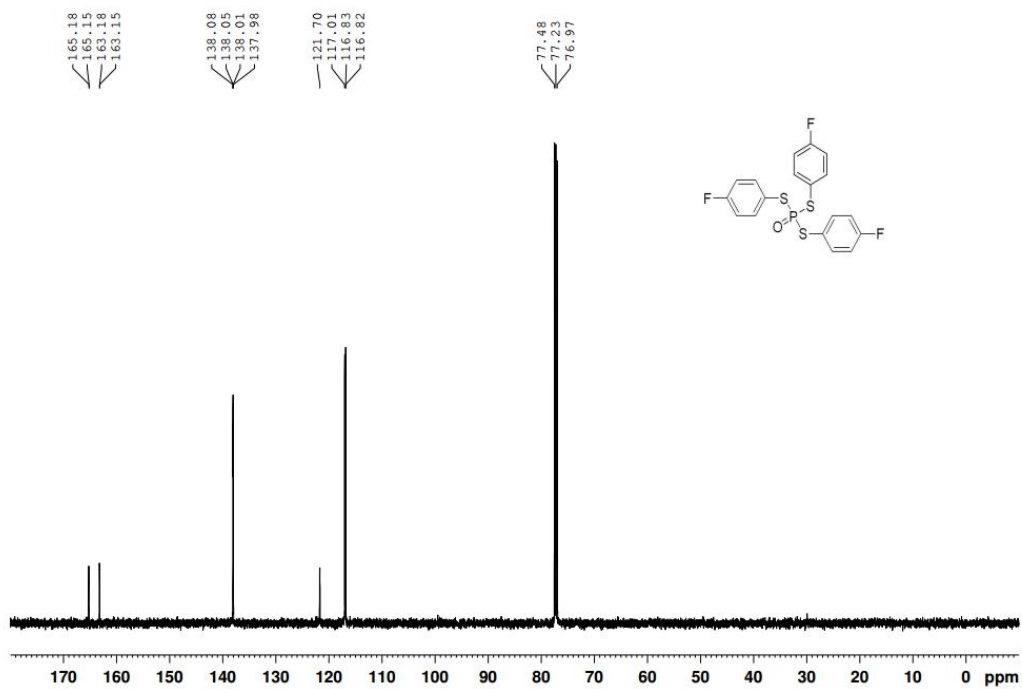

### <sup>31</sup>P NMR of 3f

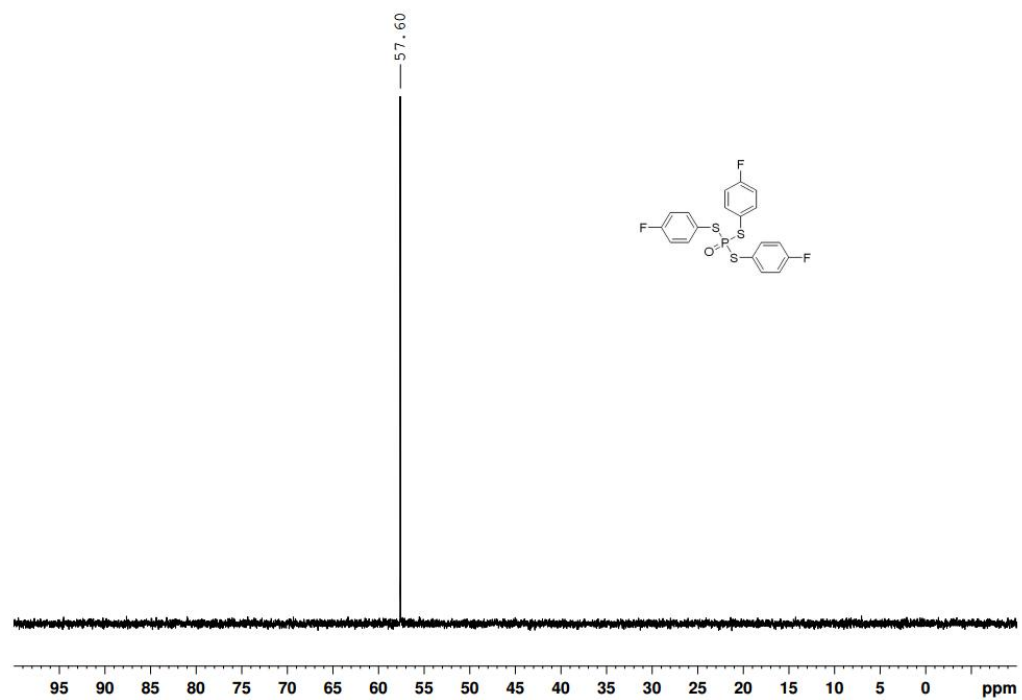

### <sup>19</sup>F NMR of 3f

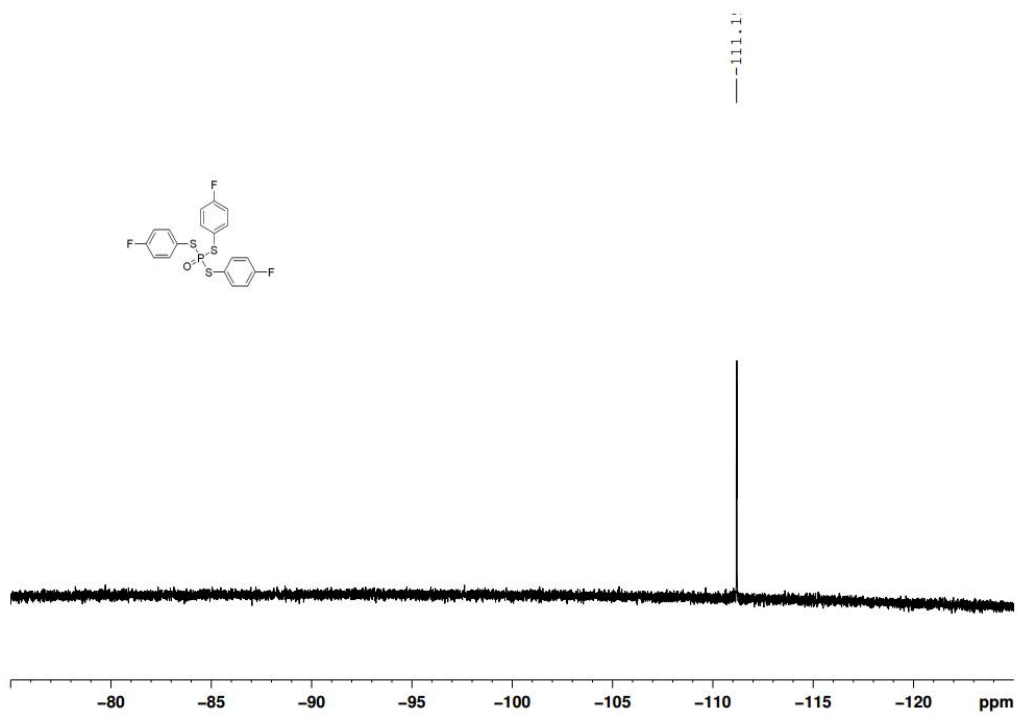

### <sup>1</sup>H NMR of 3g

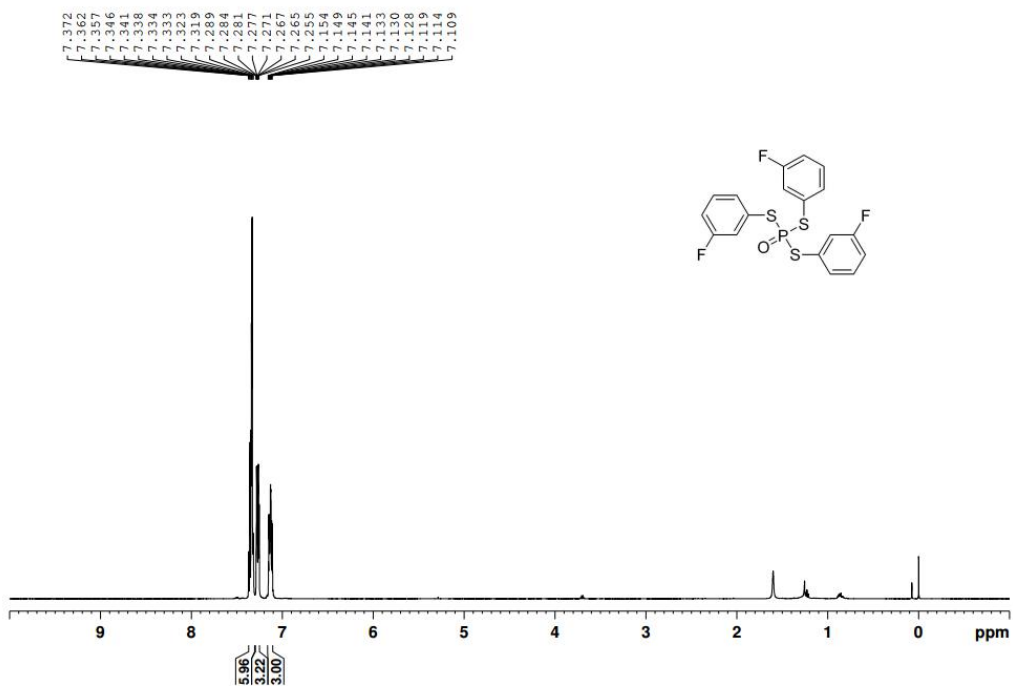

### <sup>13</sup>C NMR of 3g

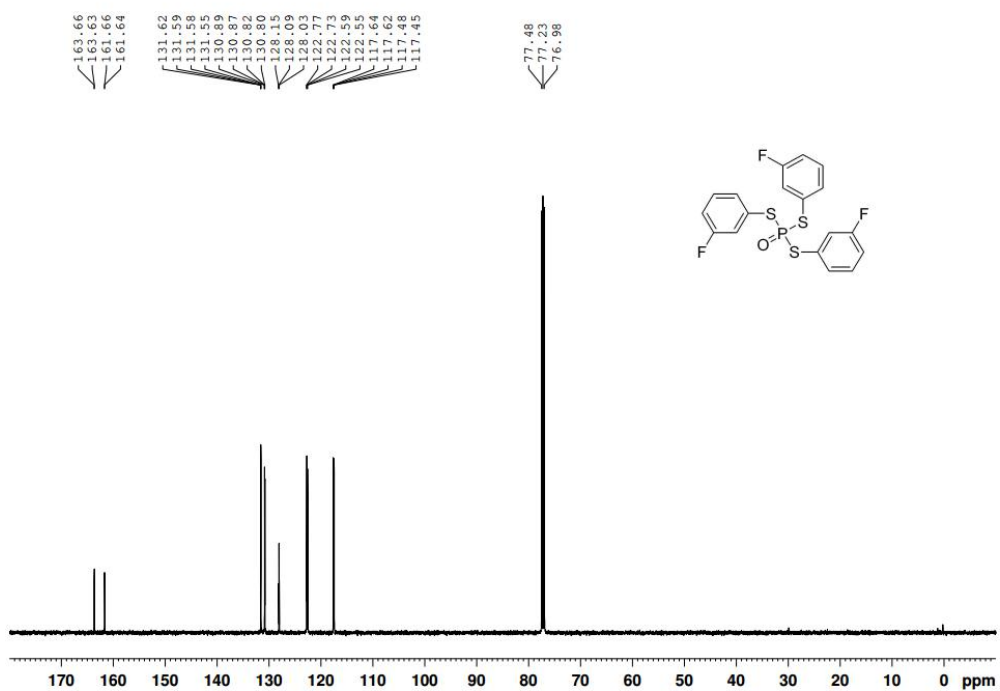

### <sup>31</sup>P NMR of 3g

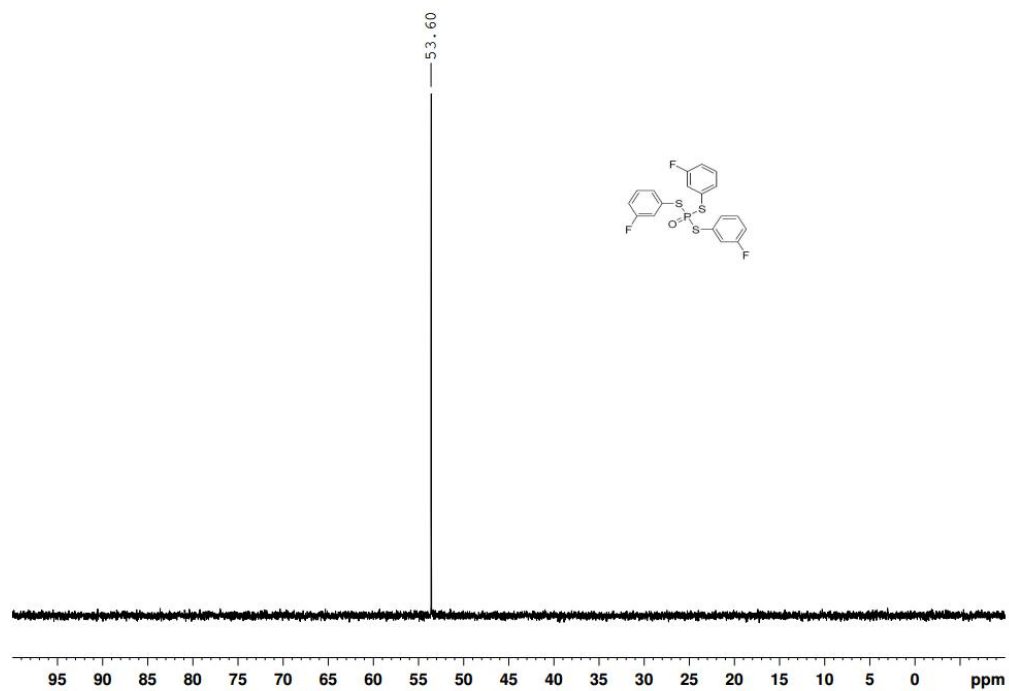

### <sup>19</sup>F NMR of 3g

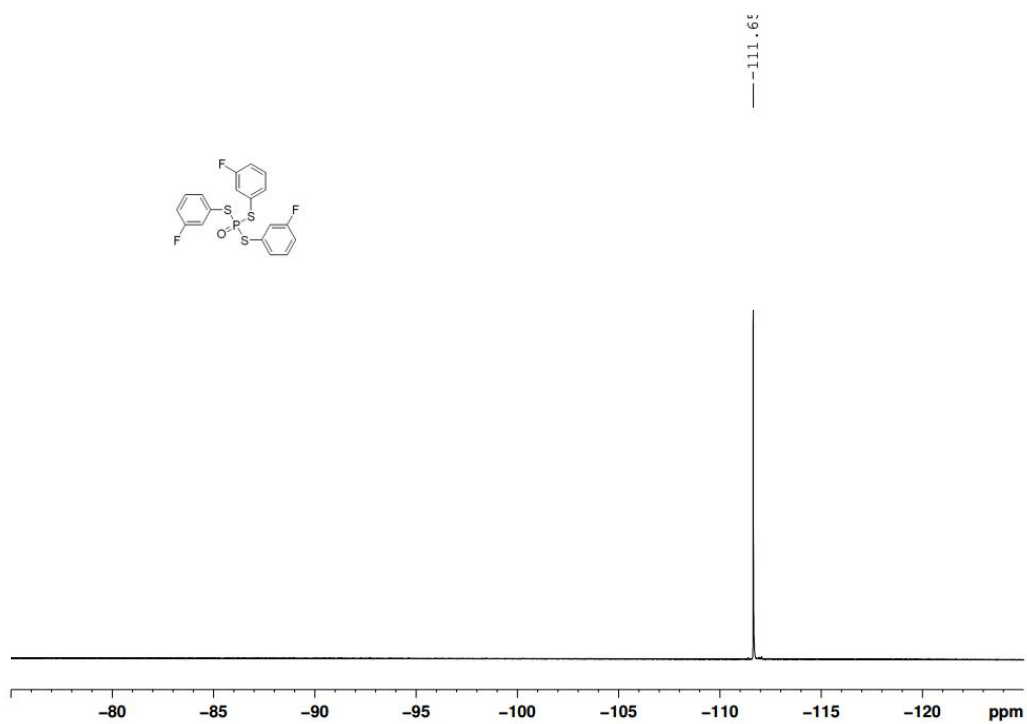

### <sup>1</sup>H NMR of 3h

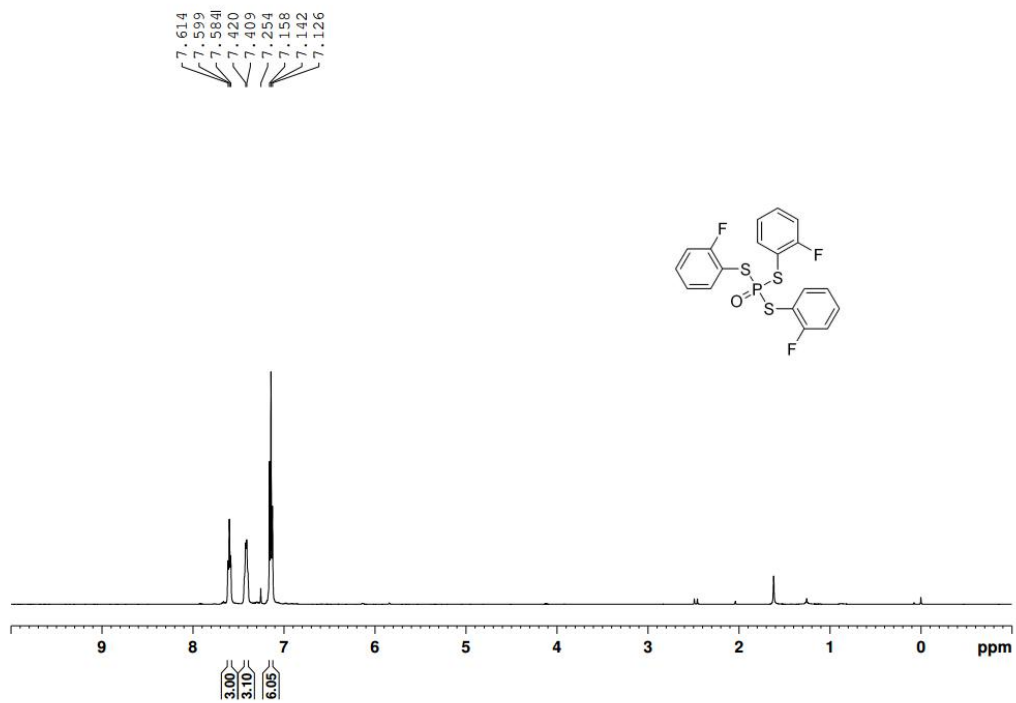

### <sup>13</sup>C NMR of 3h

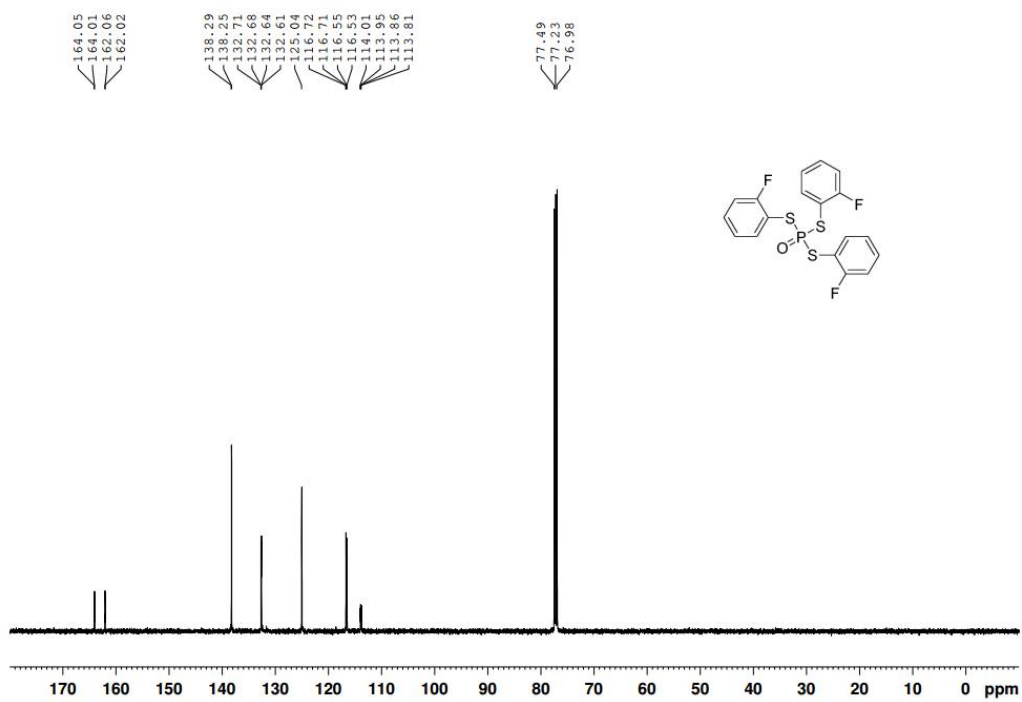

### <sup>31</sup>P NMR of 3h

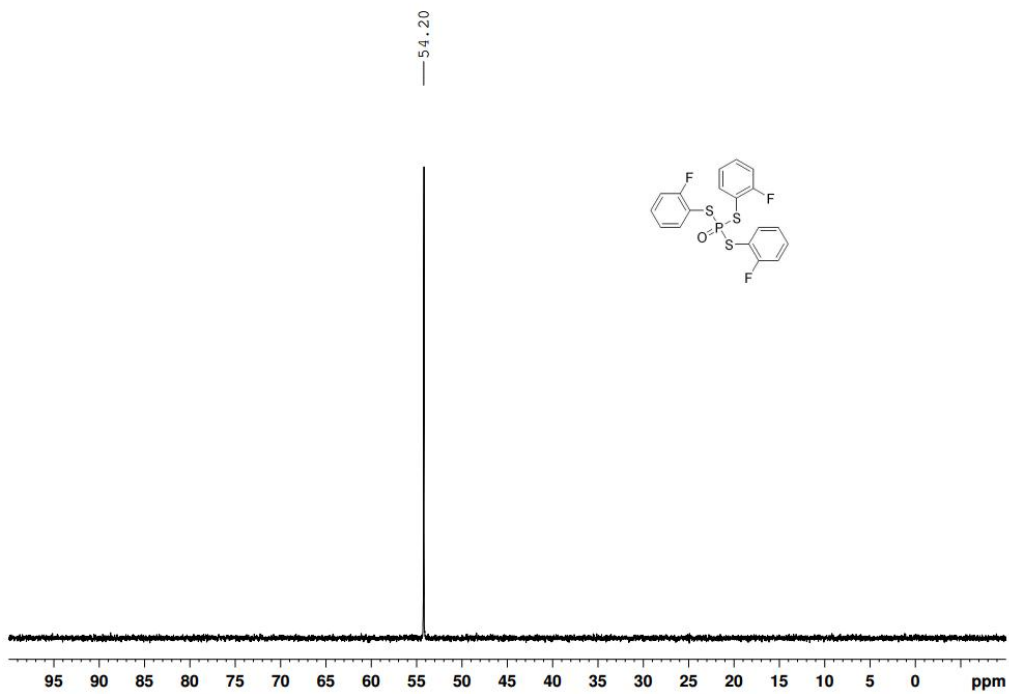

**<sup>19</sup>F NMR of 3h**

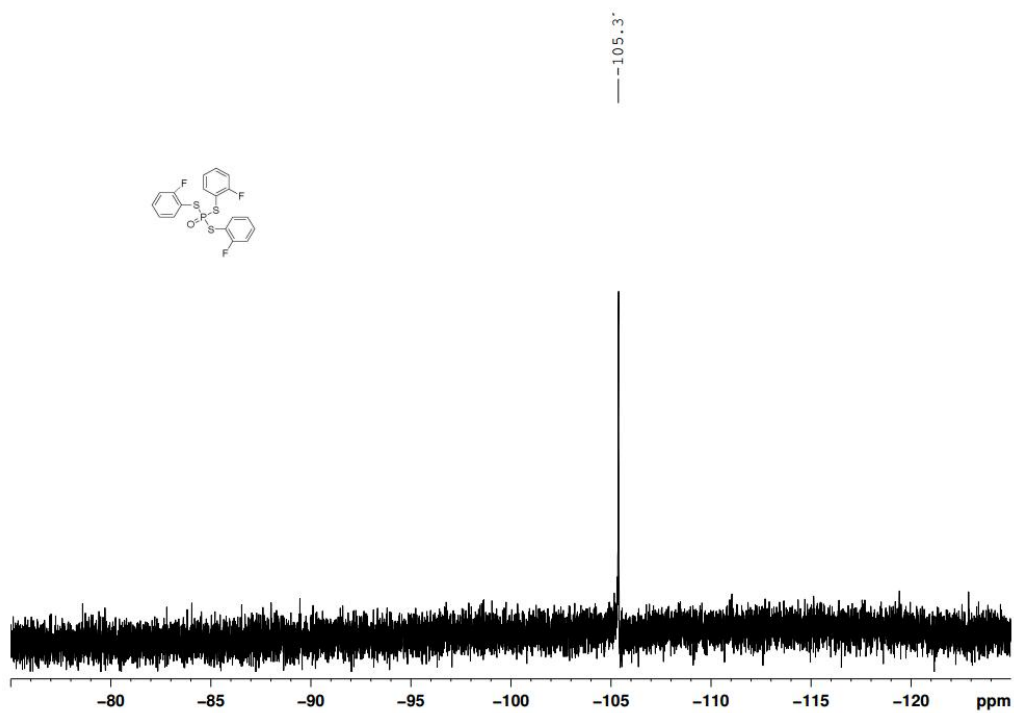

**<sup>1</sup>H NMR of 3i**

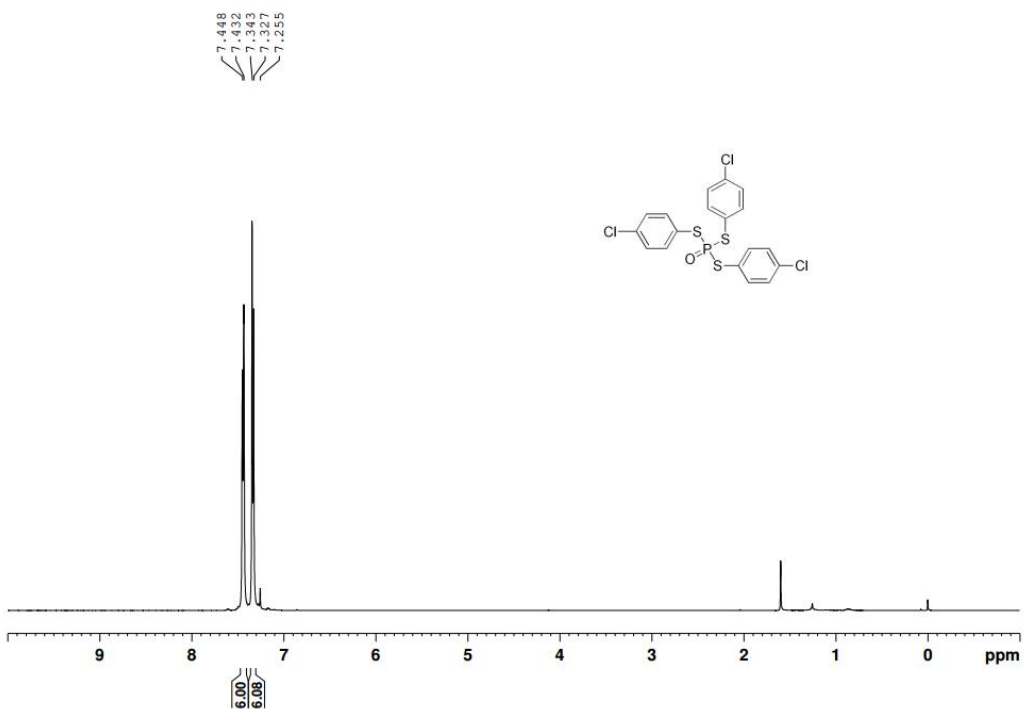

**<sup>13</sup>C NMR of 3i**



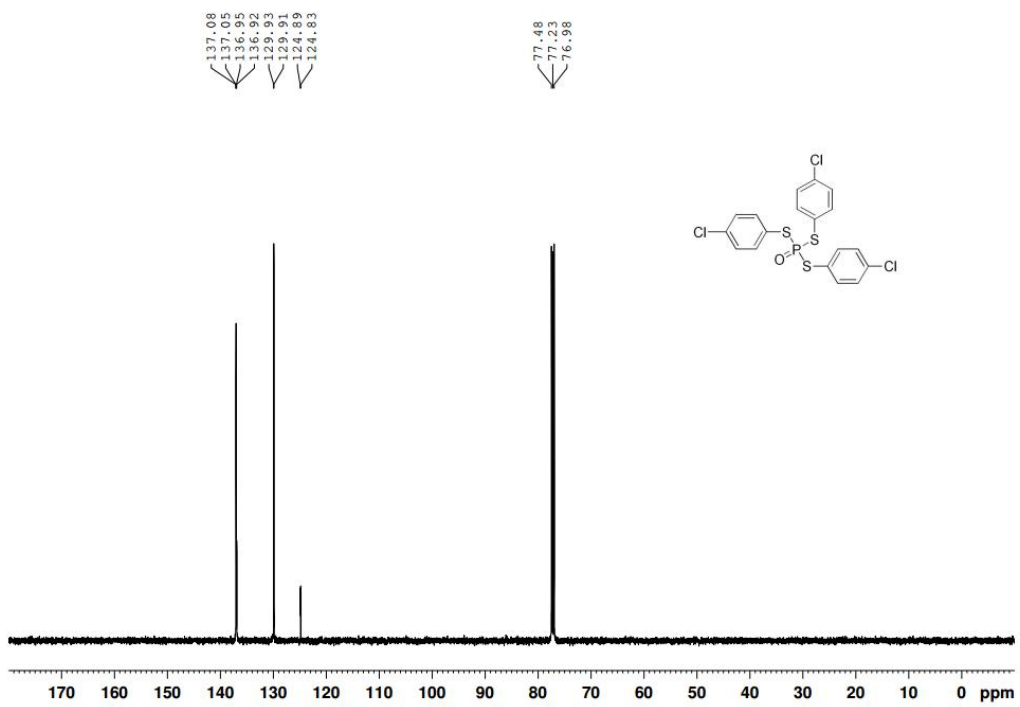

**<sup>31</sup>P NMR of 3i**

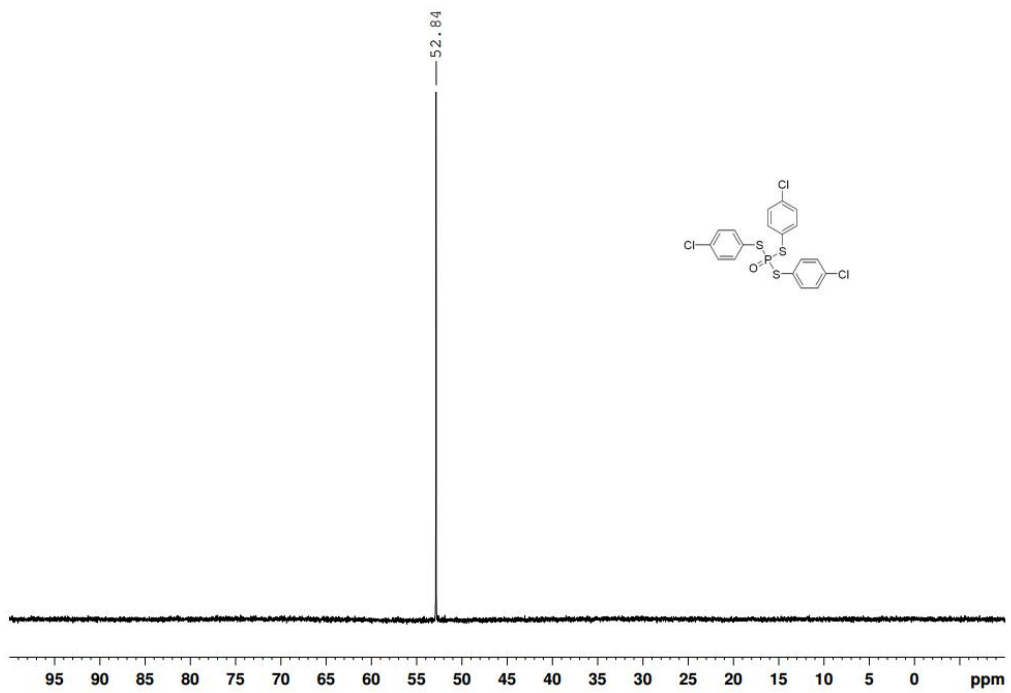

**<sup>1</sup>H NMR of 3j**

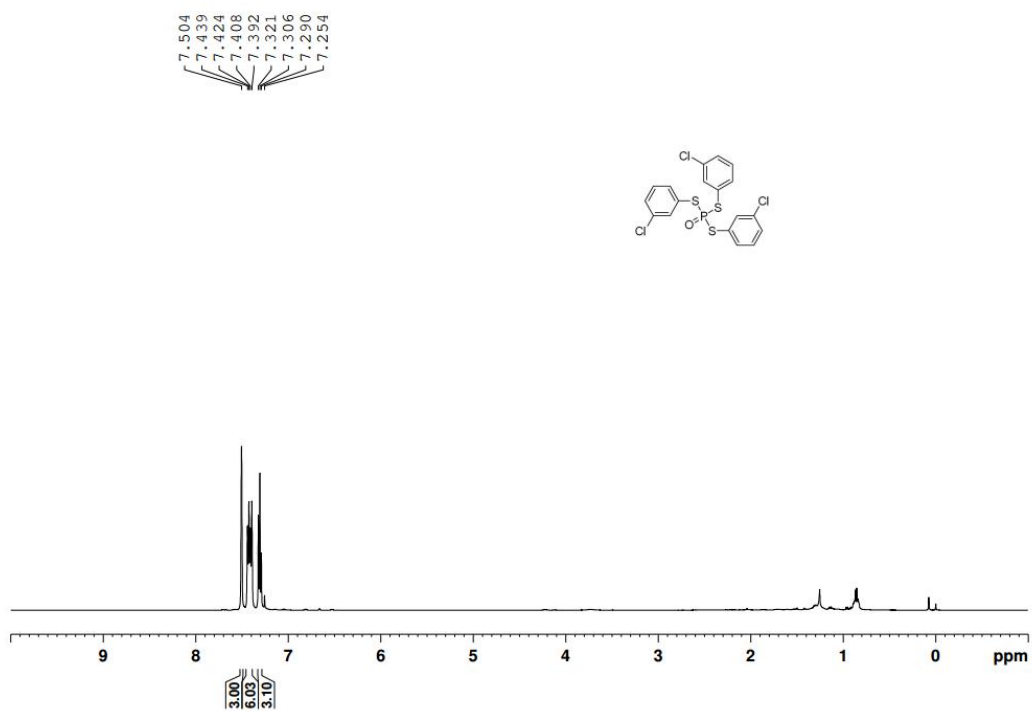

**<sup>13</sup>C NMR of 3j**

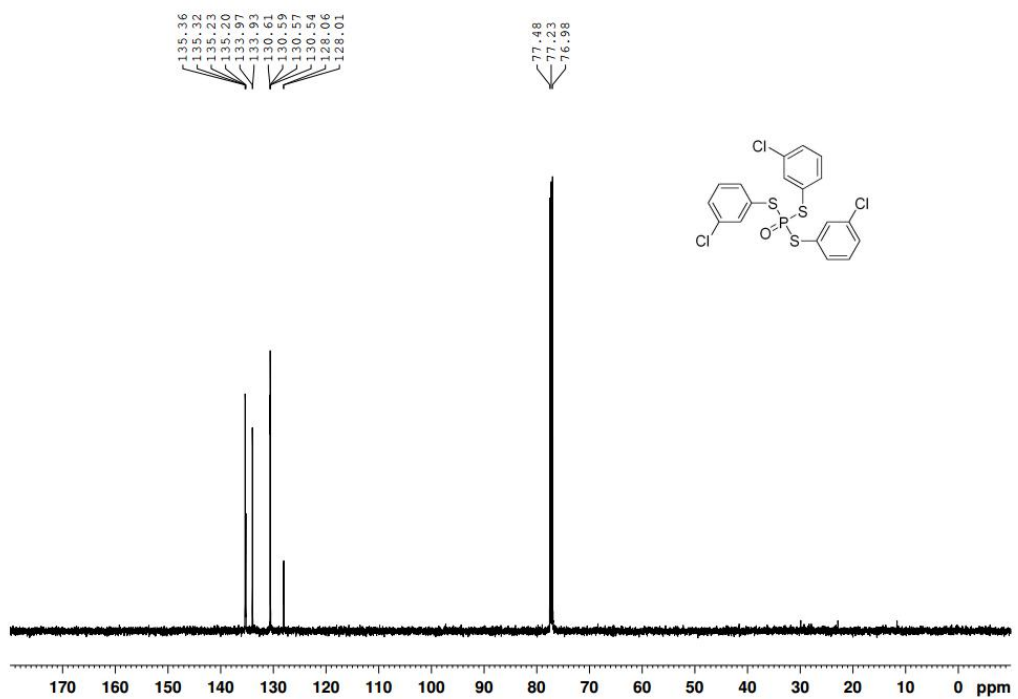

**<sup>31</sup>P NMR of 3j**

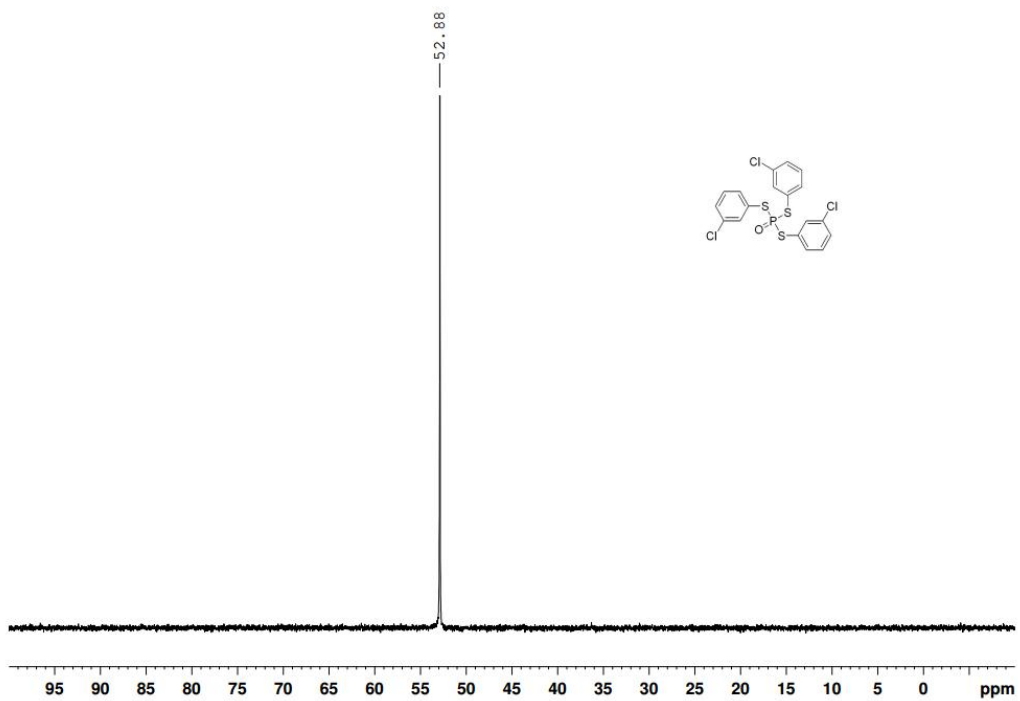

**<sup>1</sup>H NMR of 3k**

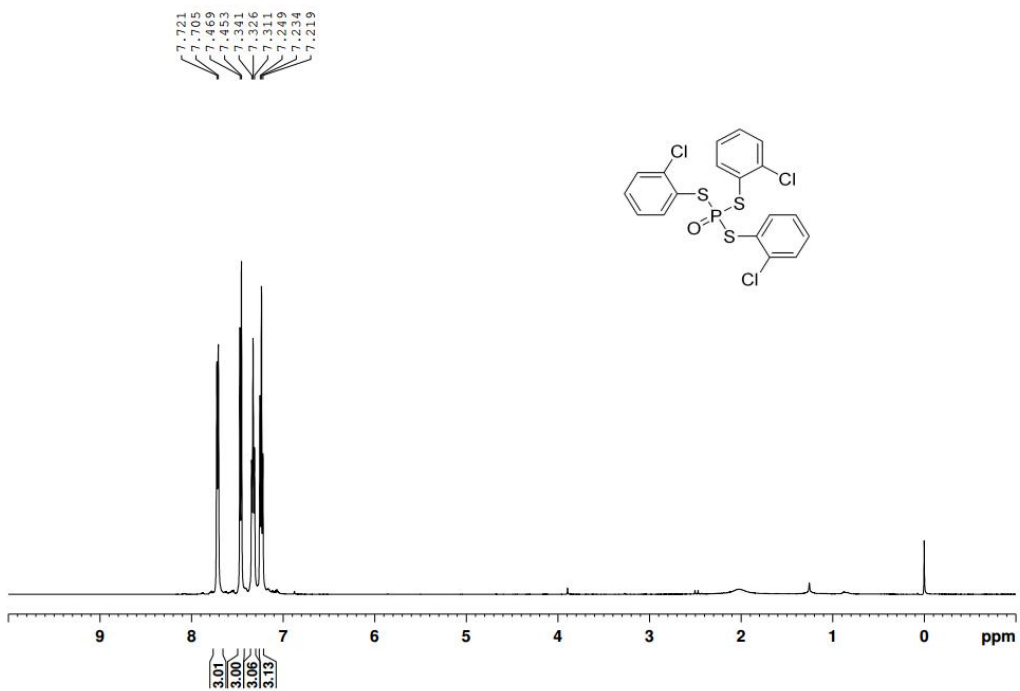

### <sup>13</sup>C NMR of 3k

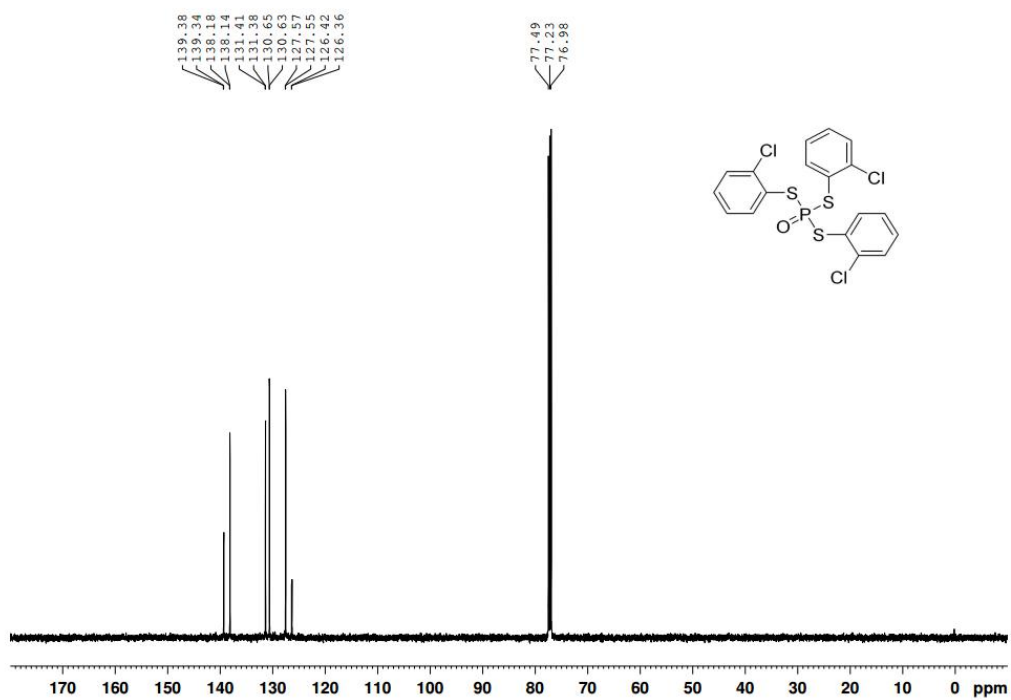

### <sup>31</sup>P NMR of 3k

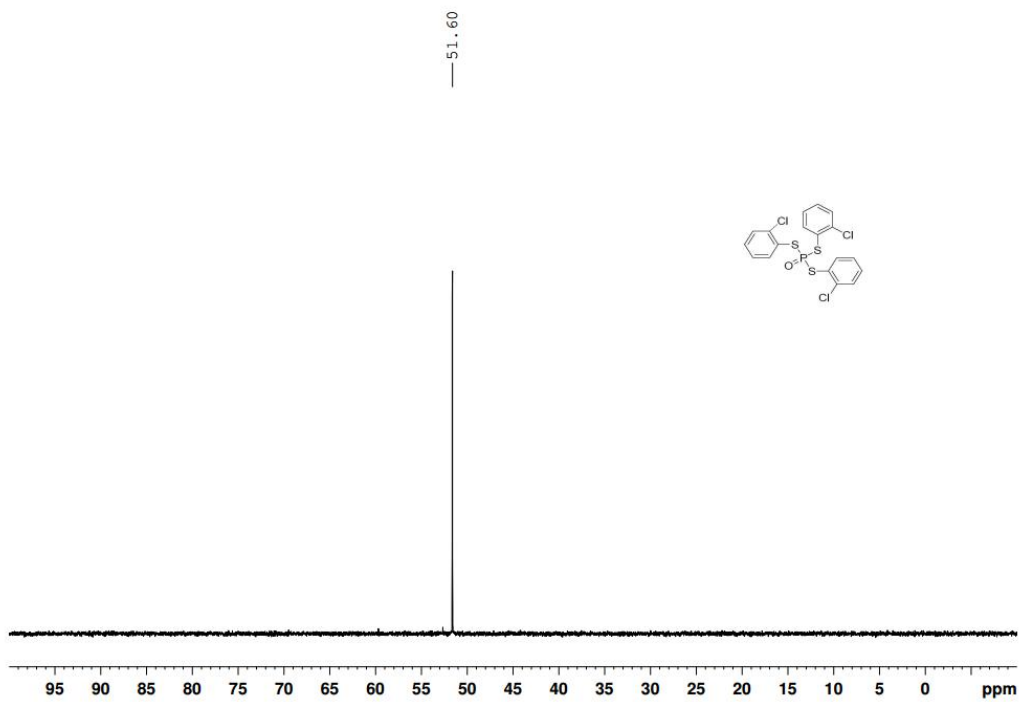

### <sup>1</sup>H NMR of 3I

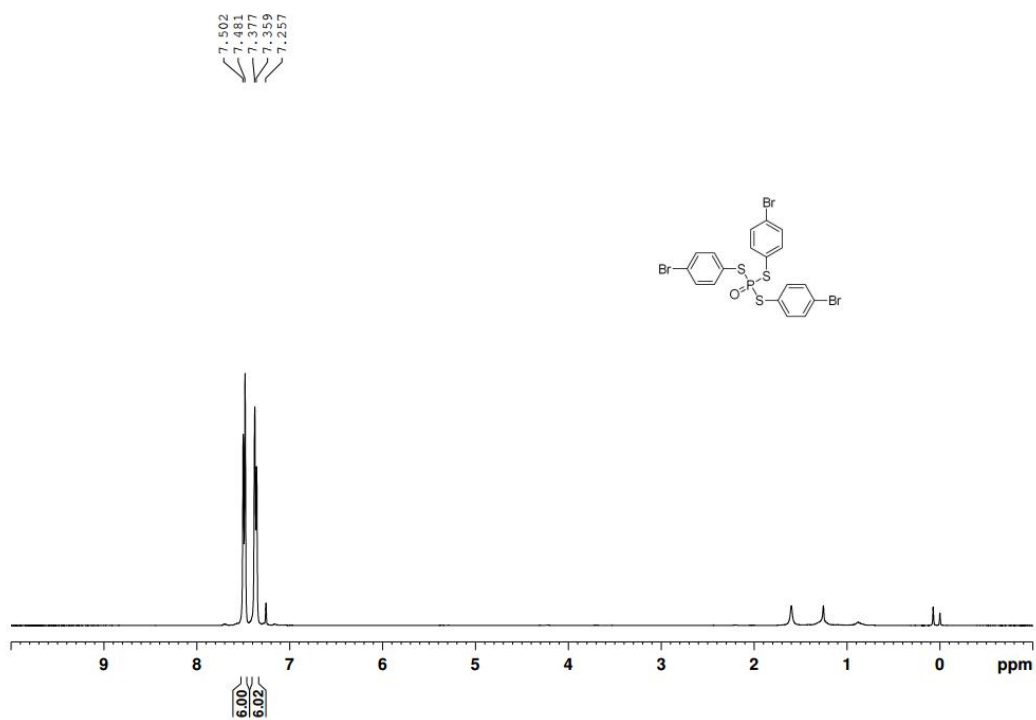

### <sup>13</sup>C NMR of 3I

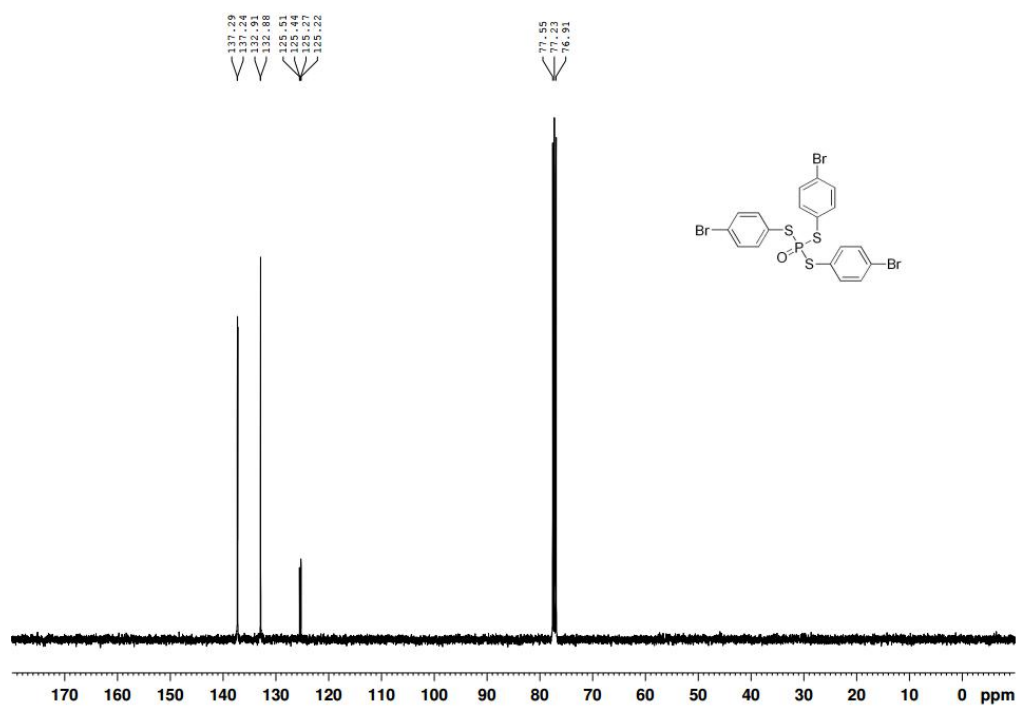

### <sup>31</sup>P NMR of 3I

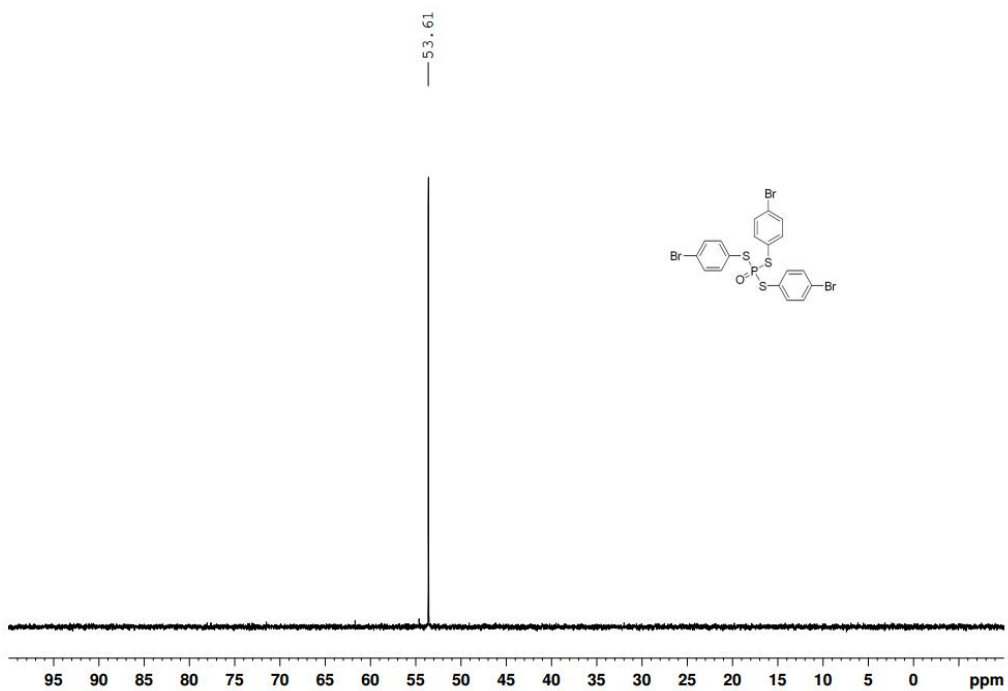

**<sup>1</sup>H NMR of 3m**

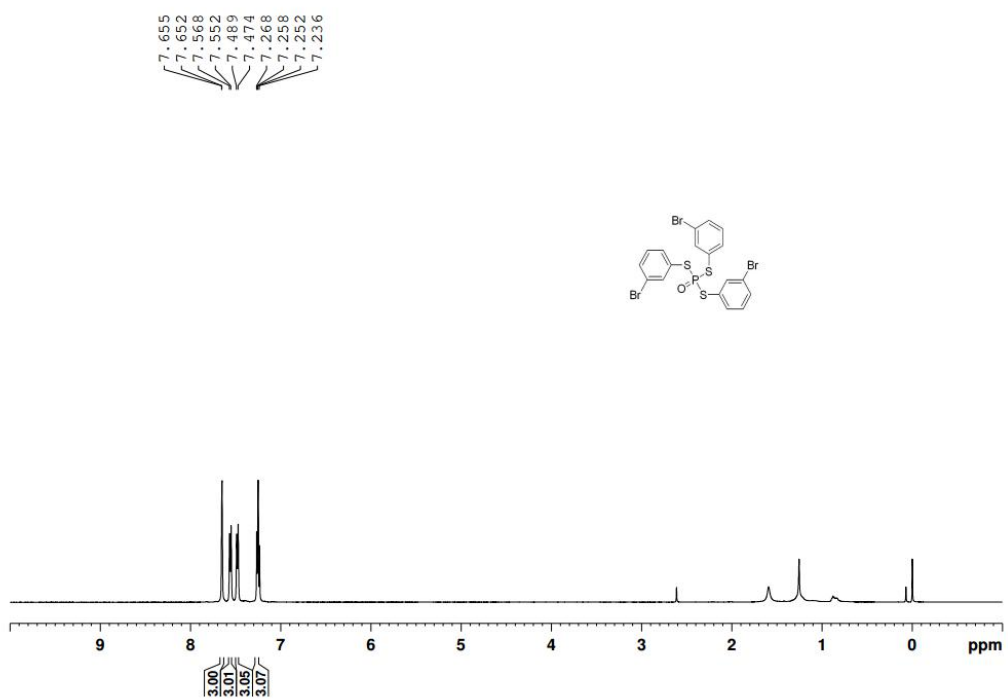

### <sup>13</sup>C NMR of 3m

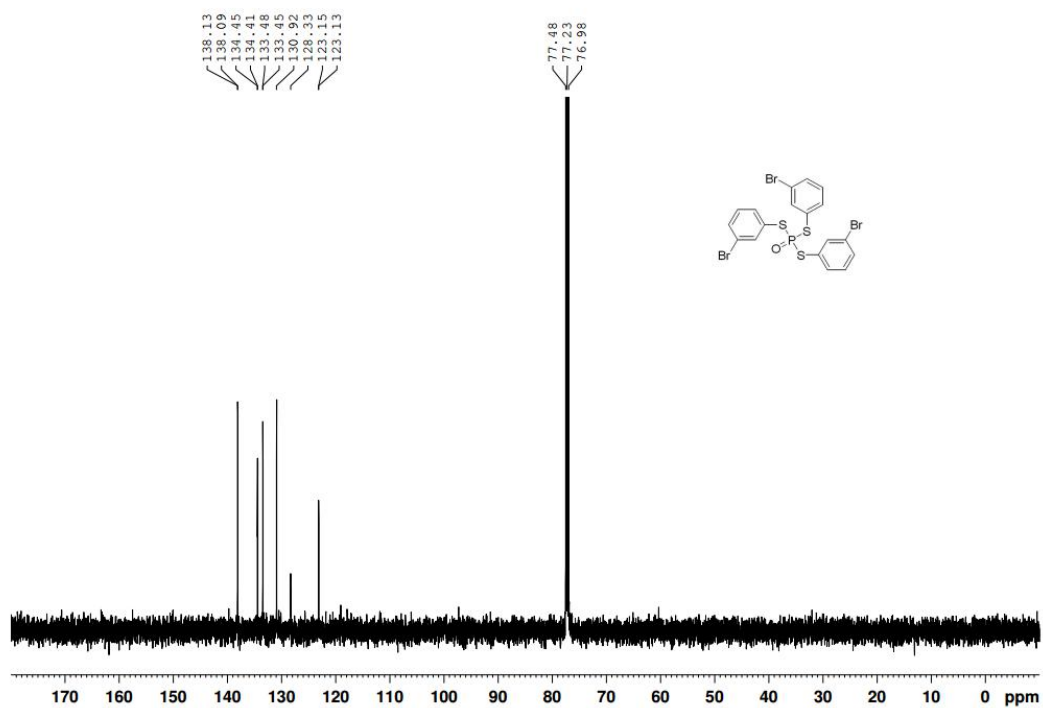

### <sup>31</sup>P NMR of 3m

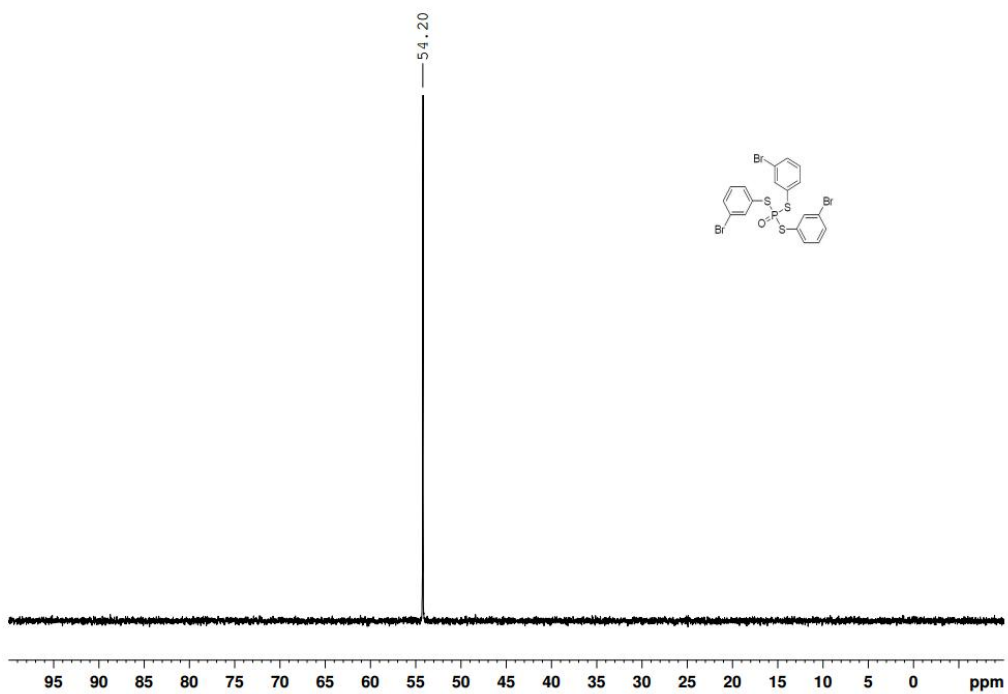

### <sup>1</sup>H NMR of 3n

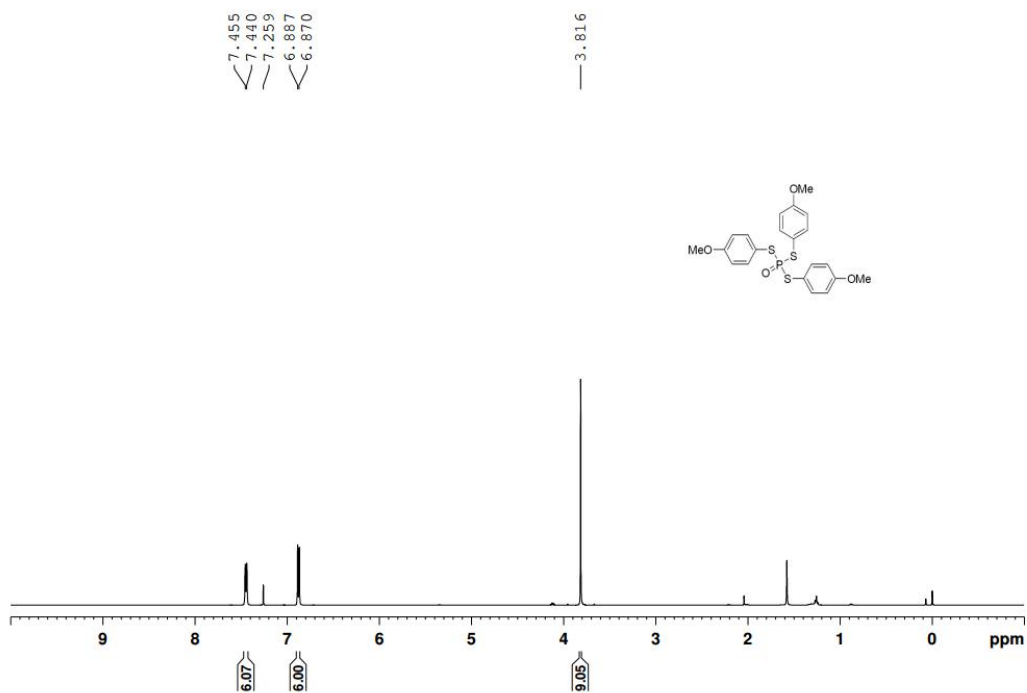

### <sup>13</sup>C NMR of 3n

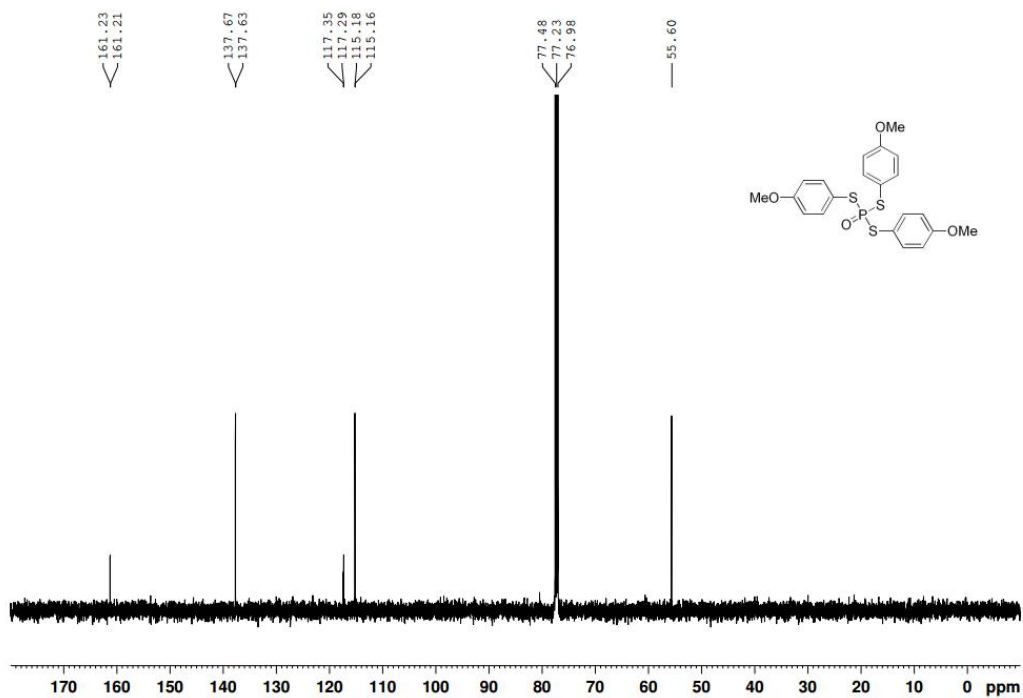



### <sup>31</sup>P NMR of 3n

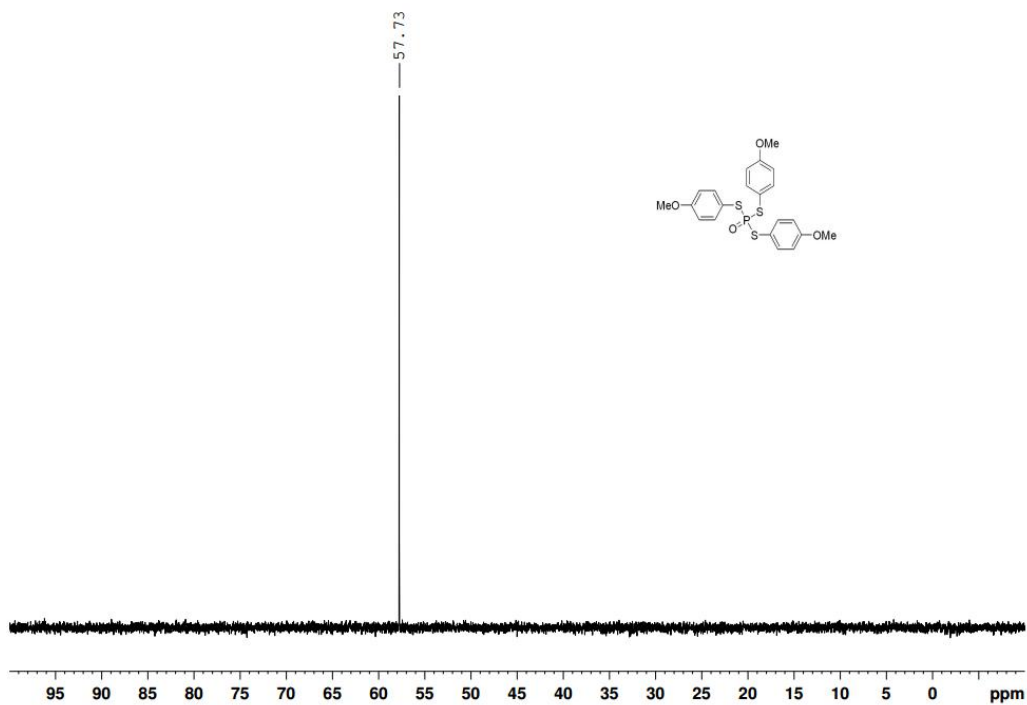

### <sup>1</sup>H NMR of 3o

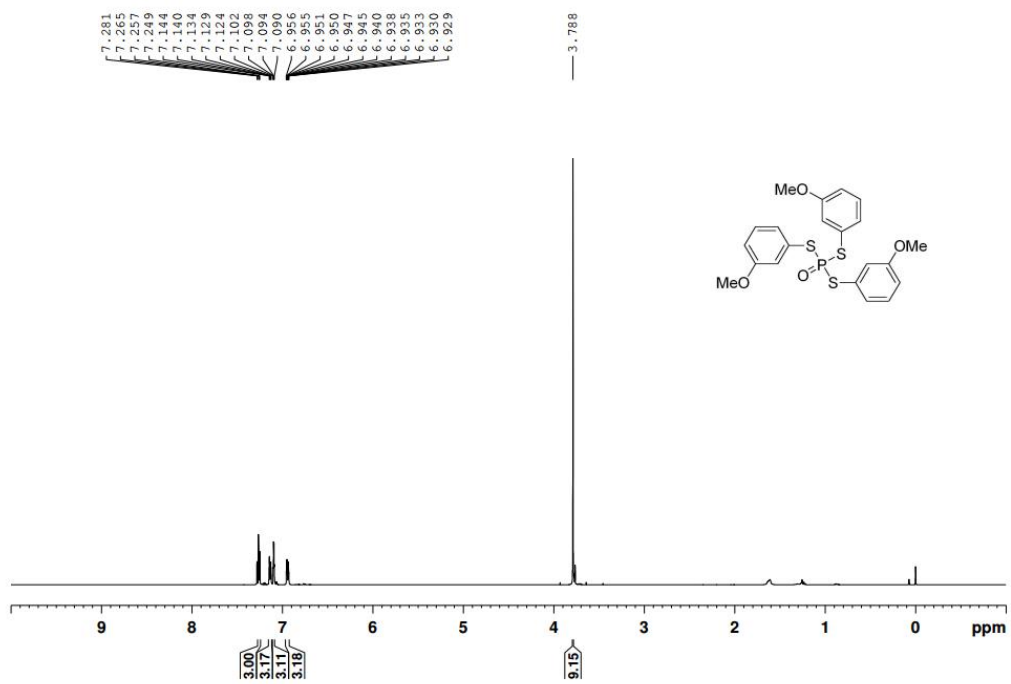

### <sup>13</sup>C NMR of **3o**

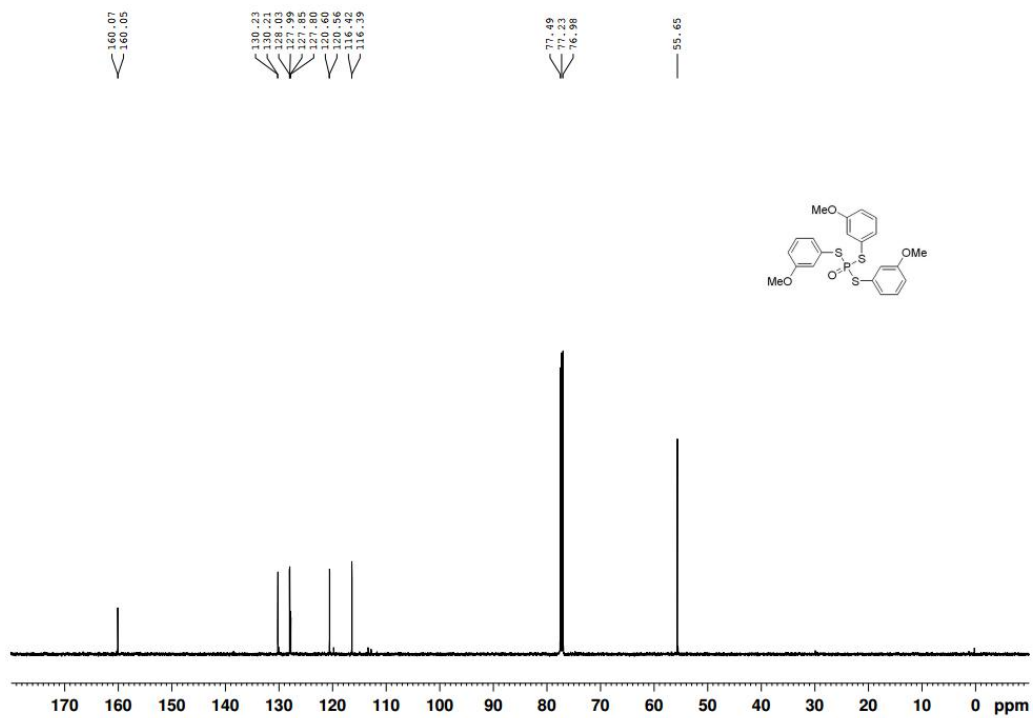

### <sup>31</sup>P NMR of **3o**

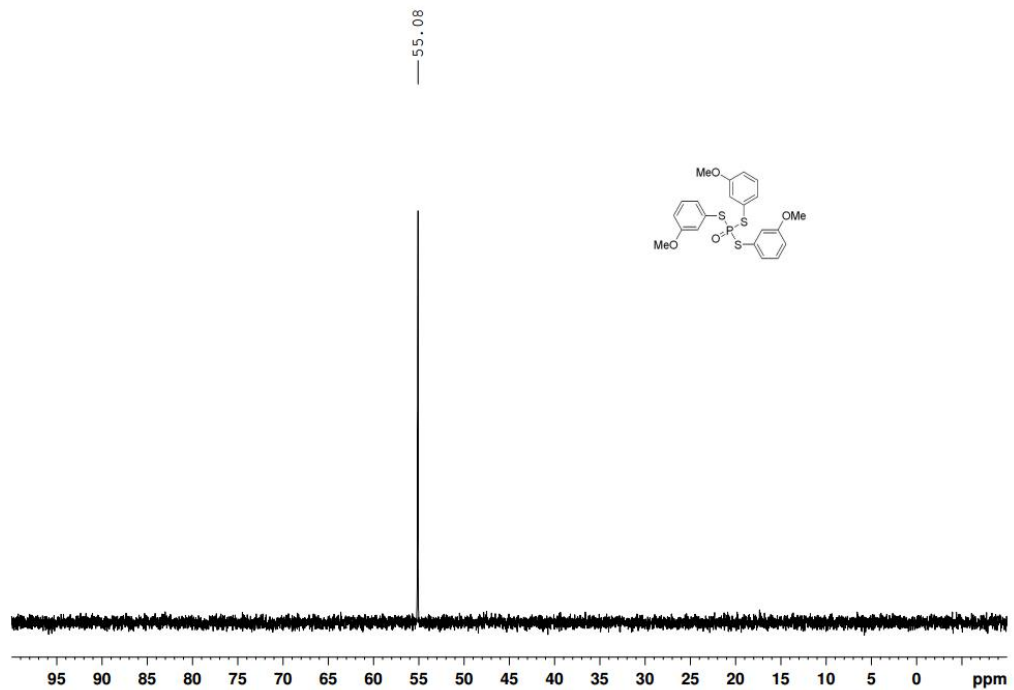

### <sup>1</sup>H NMR of 3p

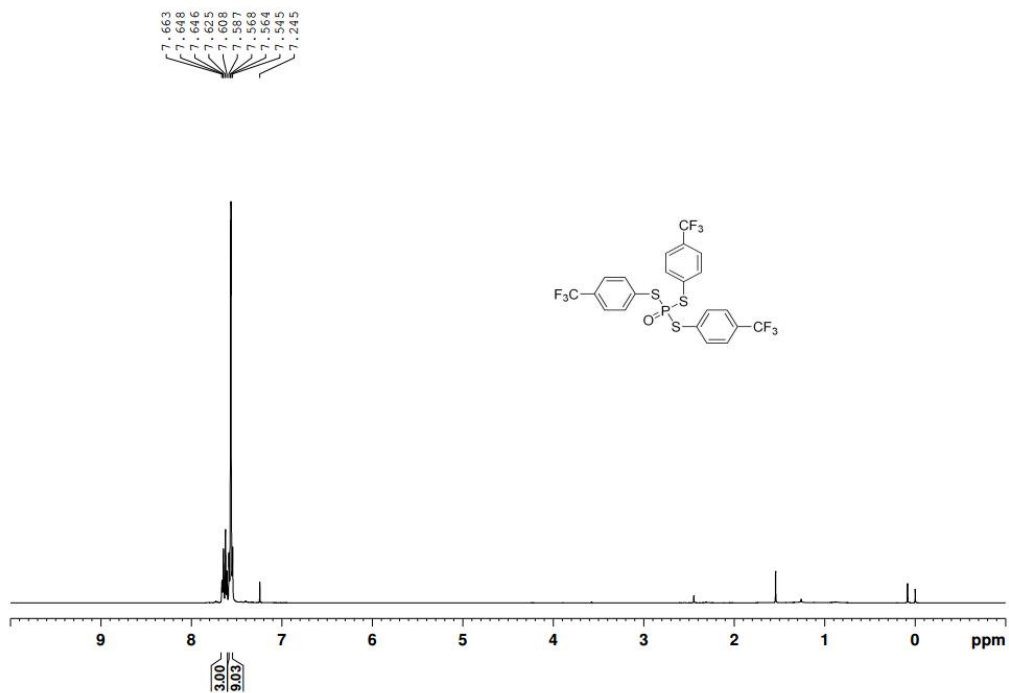

### <sup>13</sup>C NMR of 3p

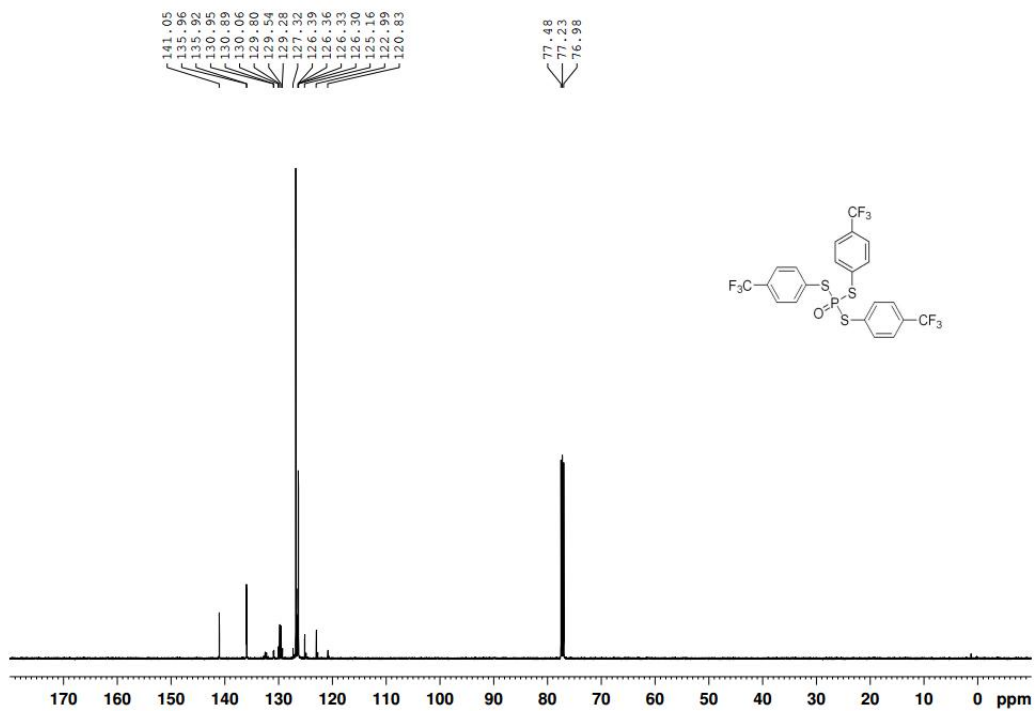

**<sup>31</sup>P NMR of 3p**

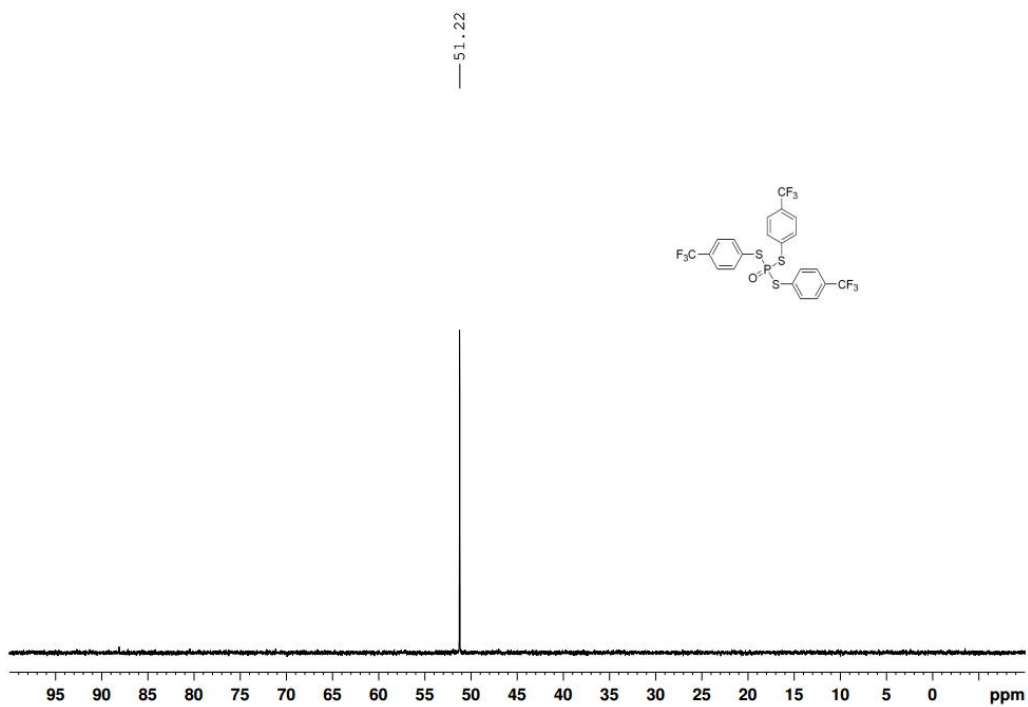

**<sup>19</sup>F NMR of 3p**

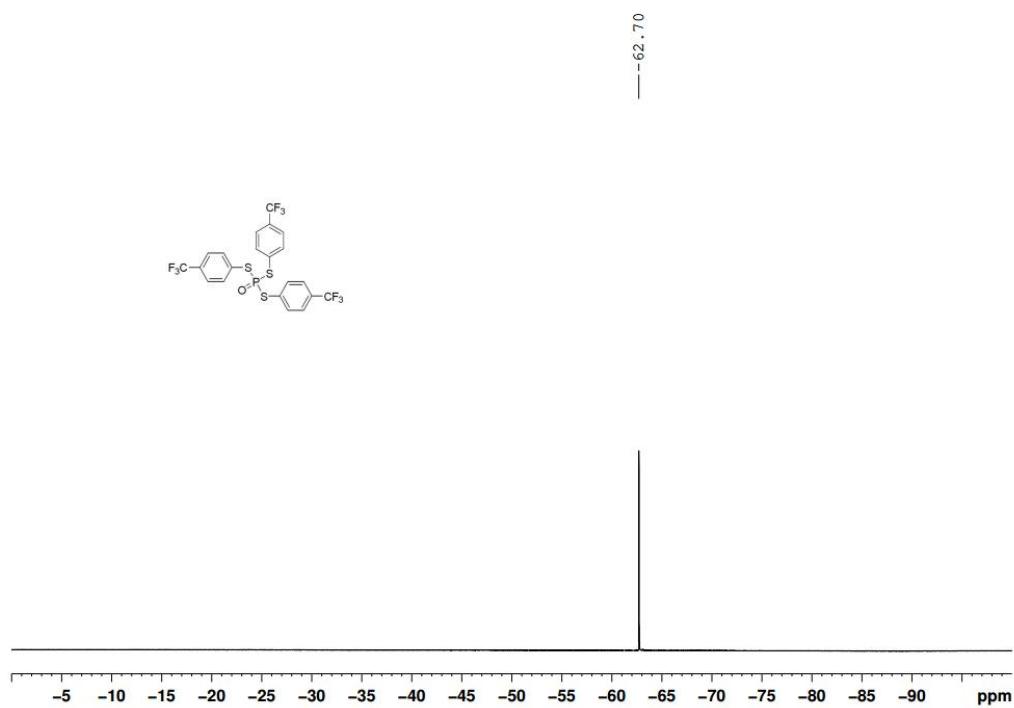

### <sup>1</sup>H NMR of 3r

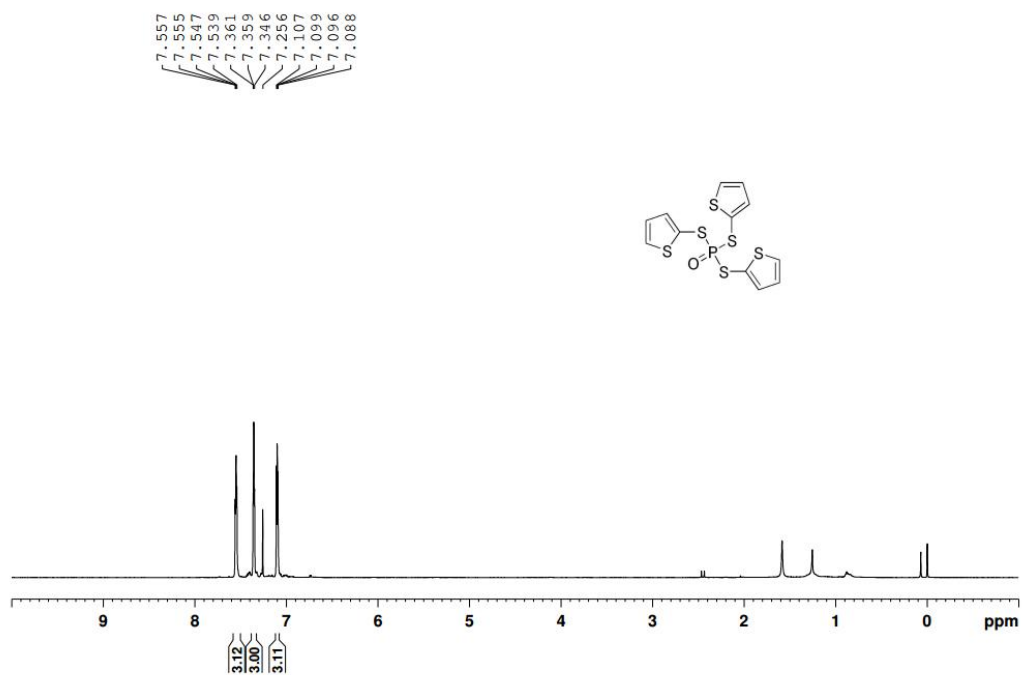

### <sup>13</sup>C NMR of 3r

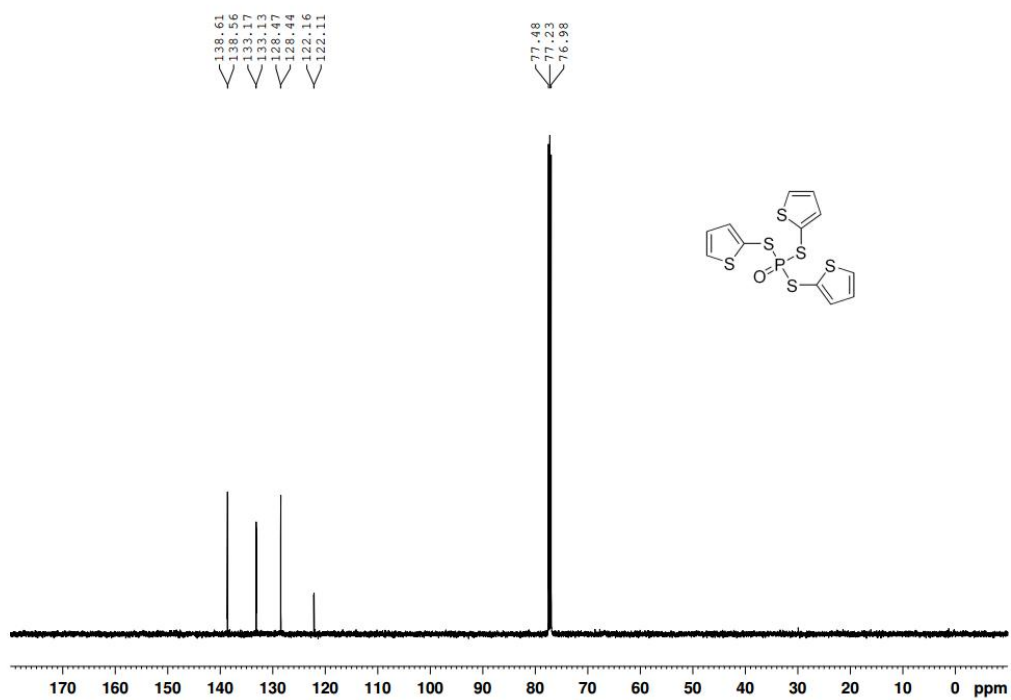

### <sup>31</sup>P NMR of 3r

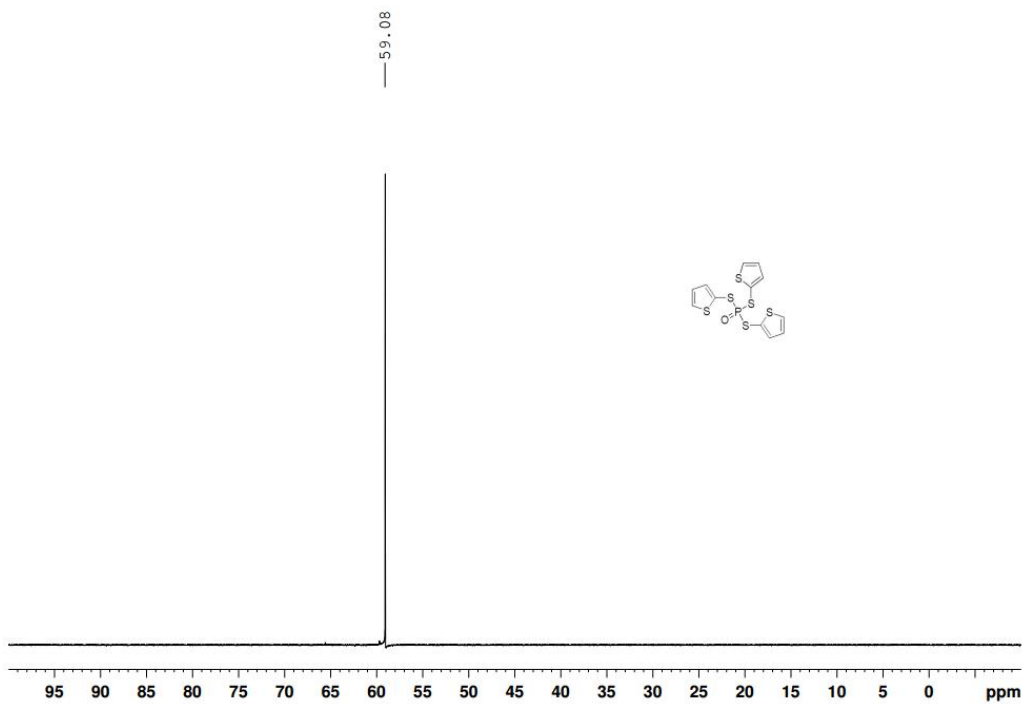

### <sup>1</sup>H NMR of 3s

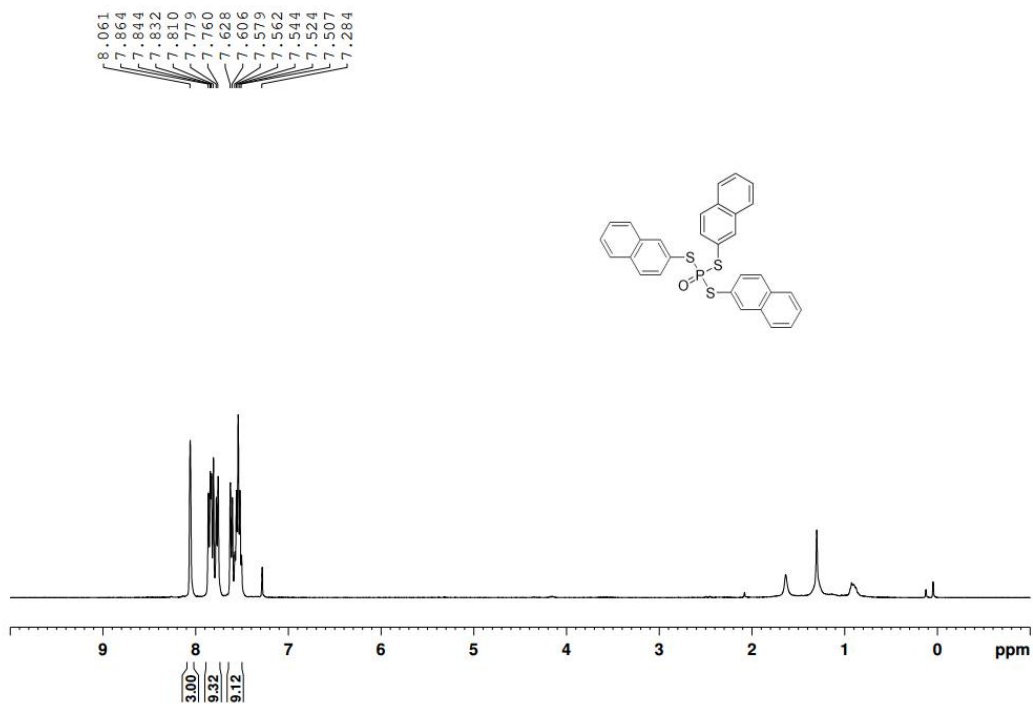

### <sup>13</sup>C NMR of 3s

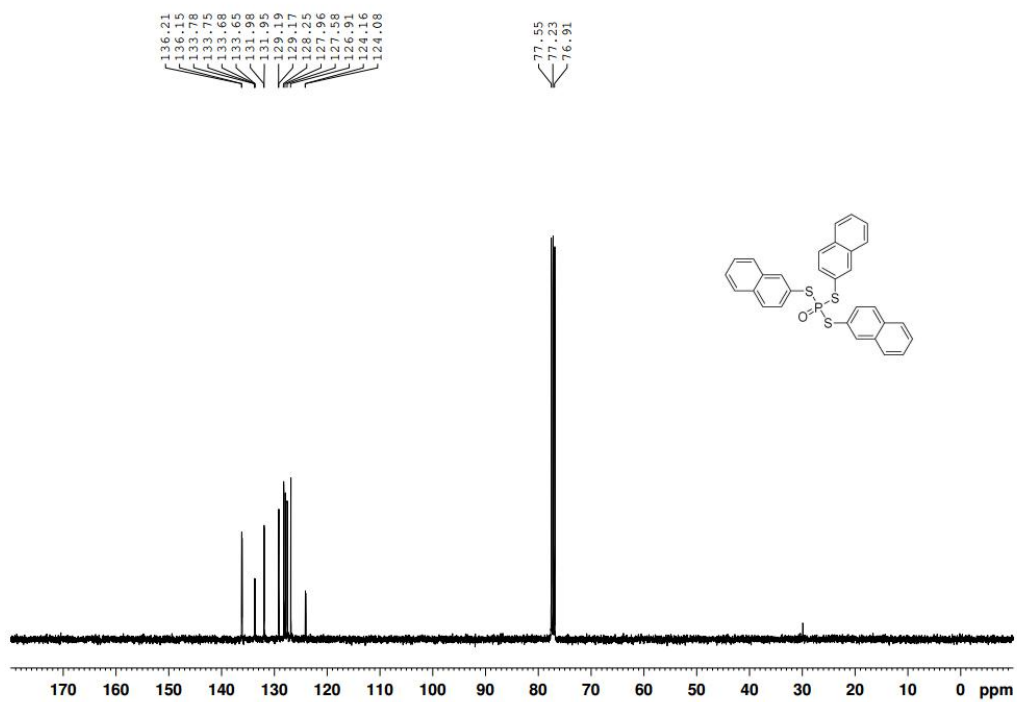

### <sup>31</sup>P NMR of 3s

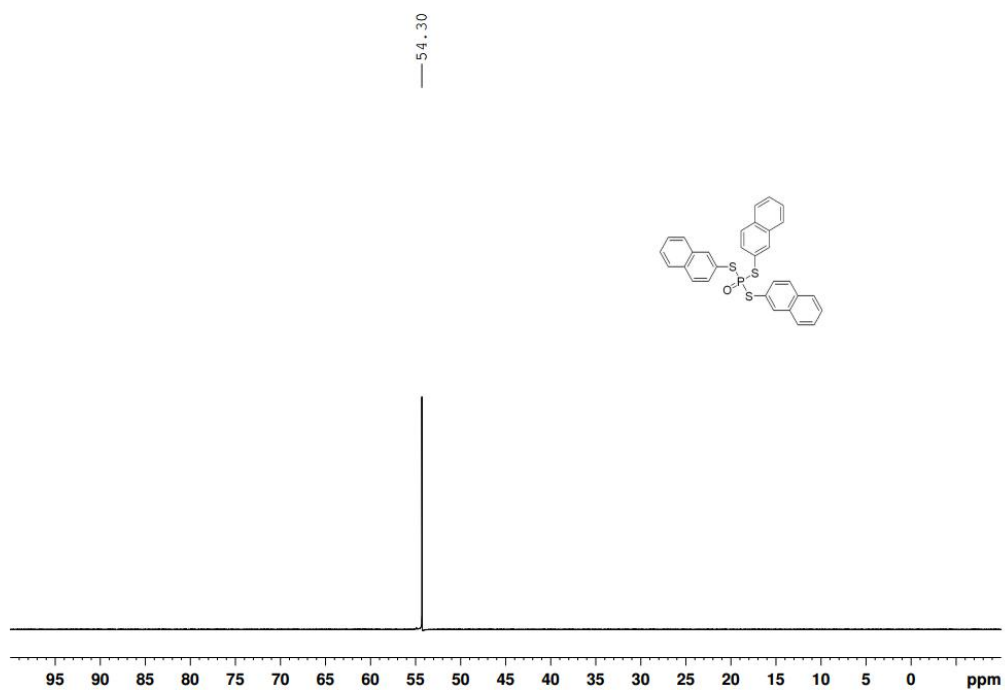

### <sup>1</sup>H NMR of 3t

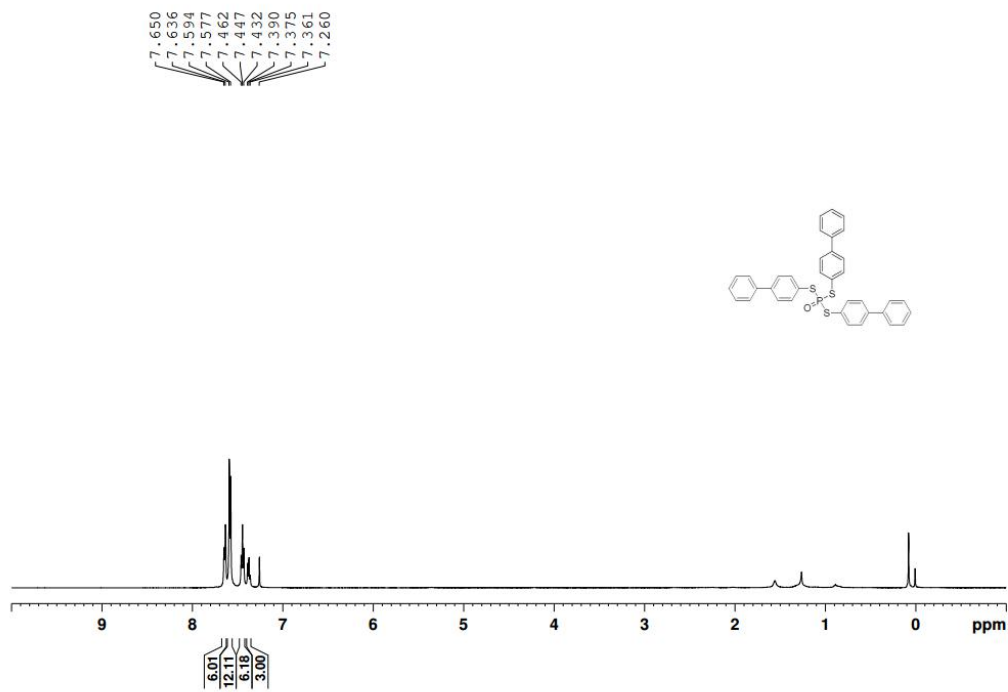

### <sup>13</sup>C NMR of 3t

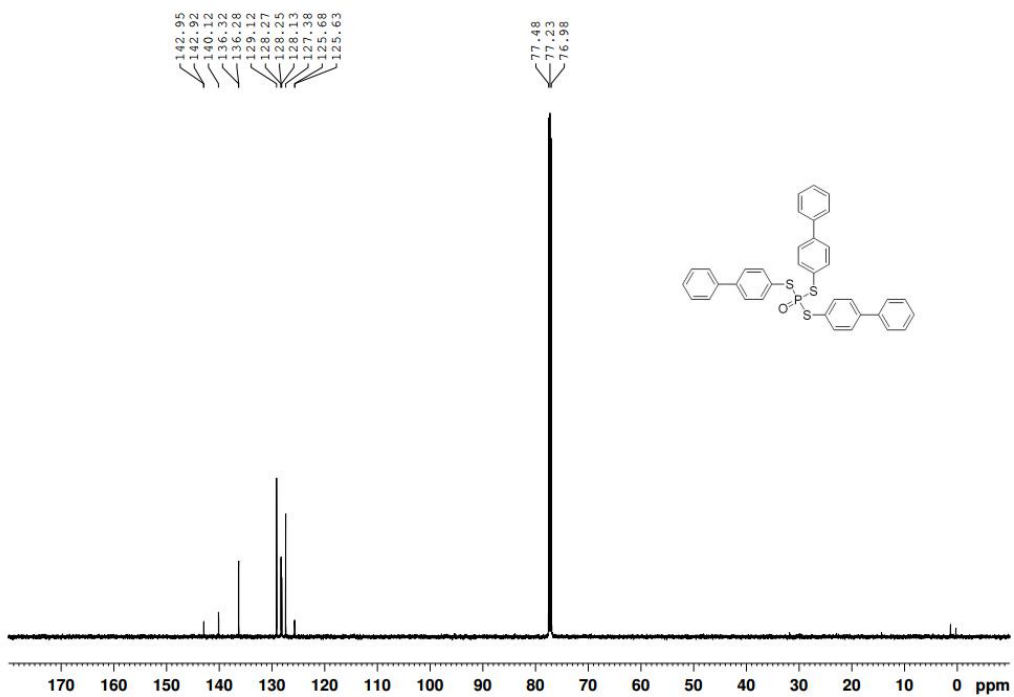



### $^{31}\text{P}$ NMR of 3t

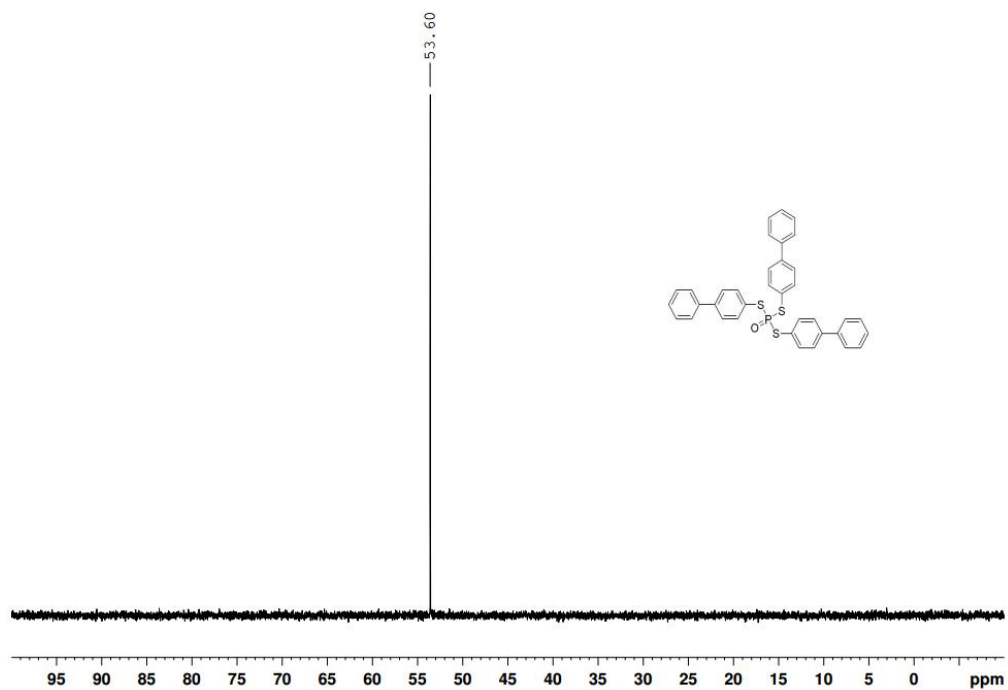

### $^1\text{H}$ NMR of 2n

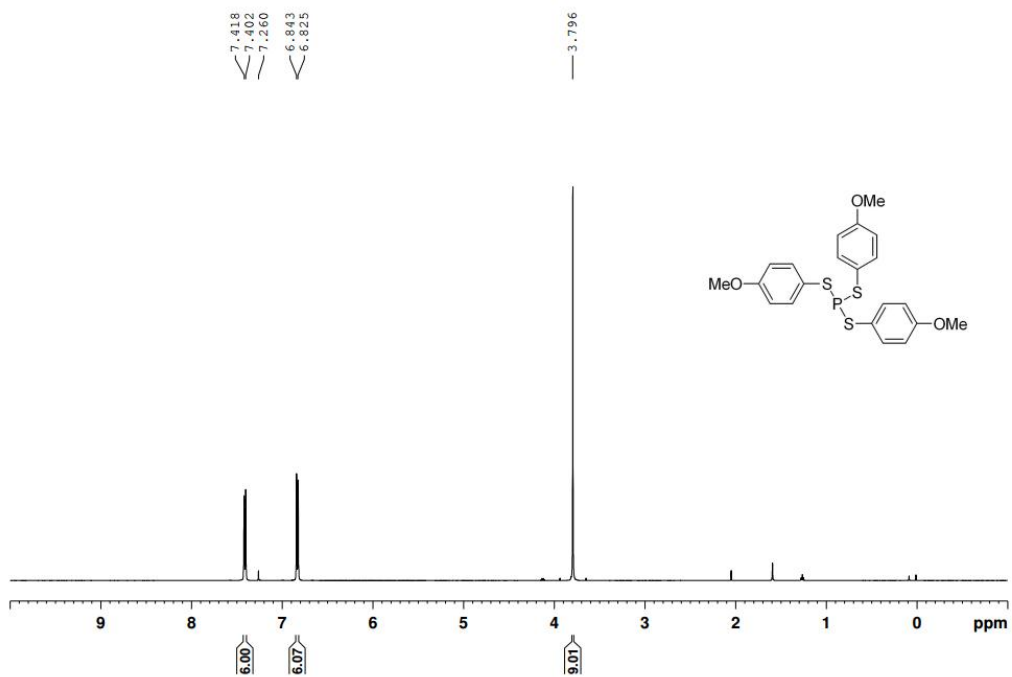

### <sup>13</sup>C NMR of 2n

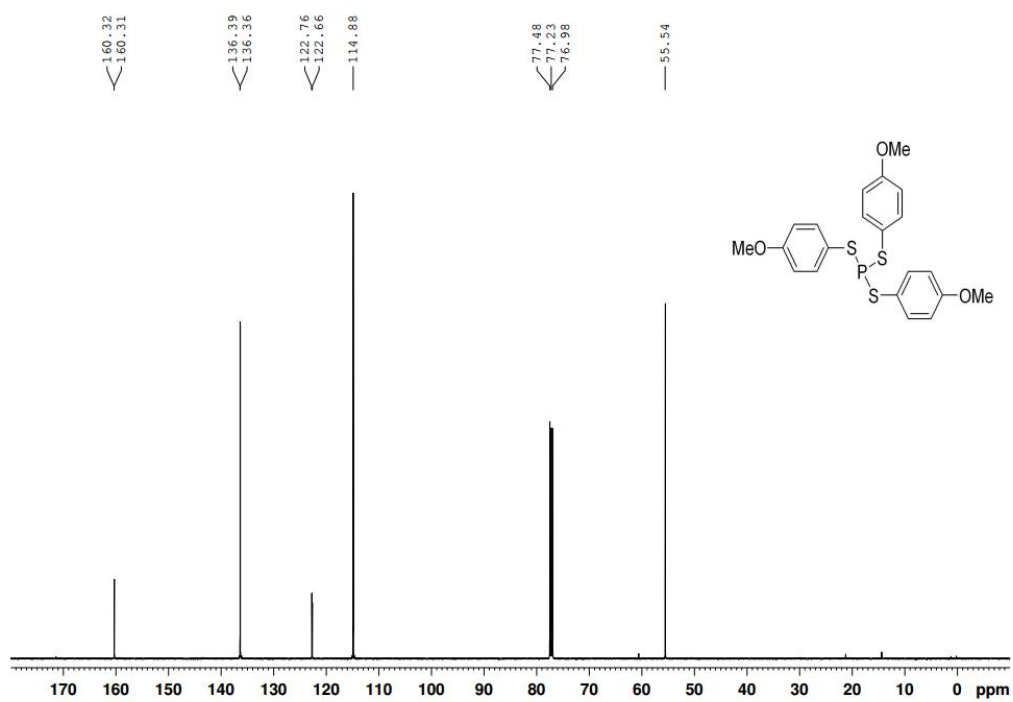

### <sup>31</sup>P NMR of 2n

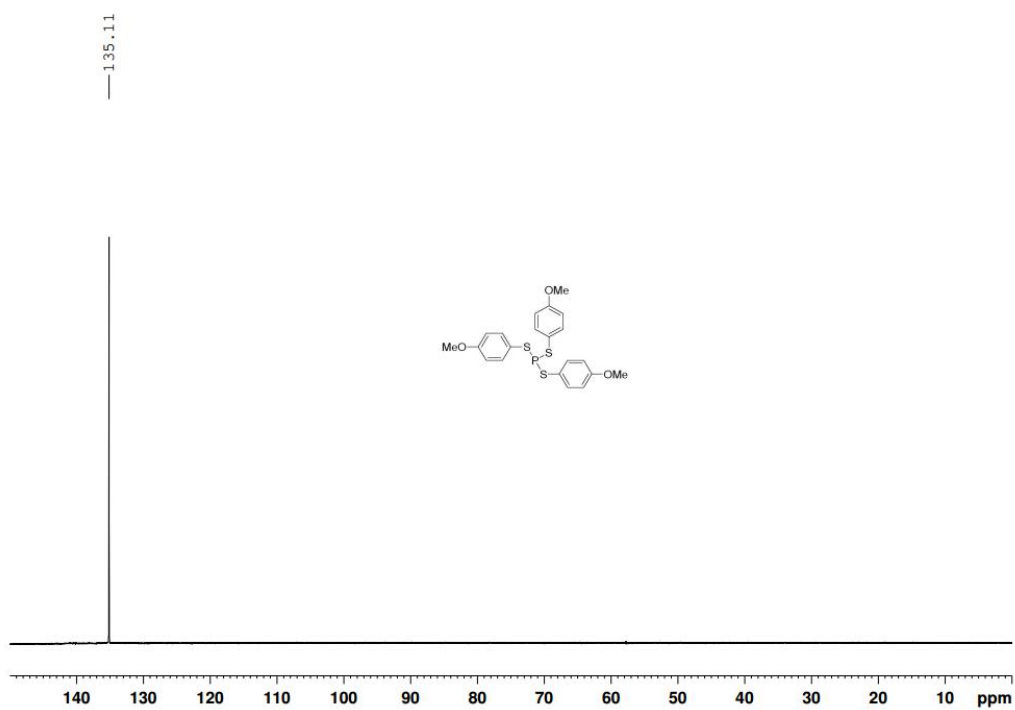

### <sup>1</sup>H NMR of 1a

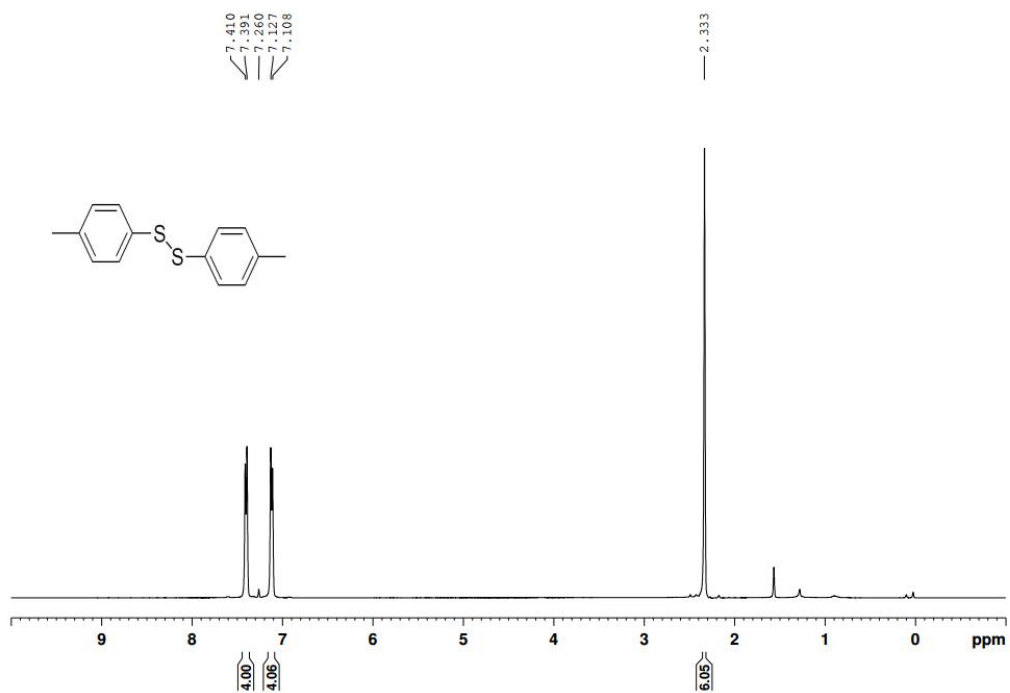

### <sup>13</sup>C NMR of 1a

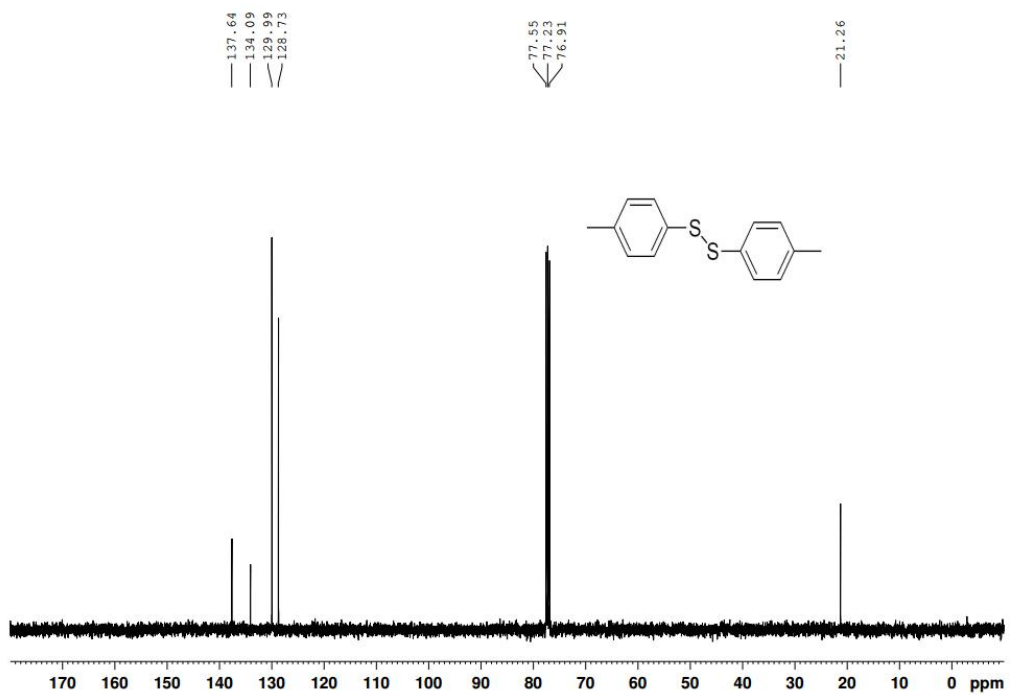

## Crystallographic spectrum for 3i:

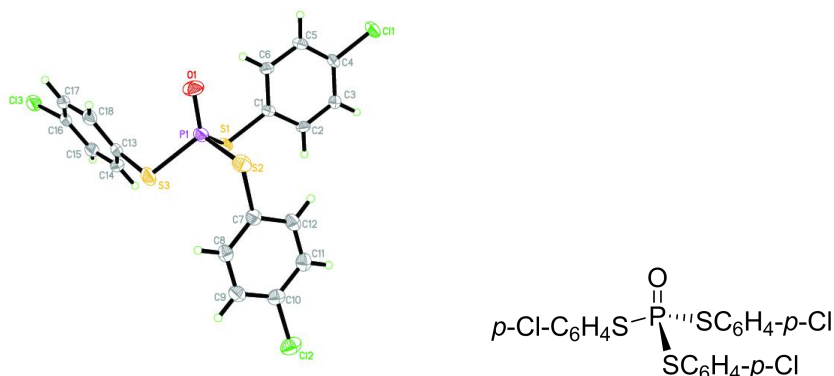

**Table 1 Crystal data and structure refinement for 3i.**

|                                               |                                                               |
|-----------------------------------------------|---------------------------------------------------------------|
| Identification code                           | y                                                             |
| Empirical formula                             | $\text{C}_{18}\text{H}_{12}\text{Cl}_3\text{OPS}_3$           |
| Formula weight                                | 477.78                                                        |
| Temperature/K                                 | 273.15                                                        |
| Crystal system                                | monoclinic                                                    |
| Space group                                   | $C2/c$                                                        |
| $a/\text{\AA}$                                | 12.268(2)                                                     |
| $b/\text{\AA}$                                | 8.6753(17)                                                    |
| $c/\text{\AA}$                                | 37.965(7)                                                     |
| $\alpha/^\circ$                               | 90.00                                                         |
| $\beta/^\circ$                                | 92.878(3)                                                     |
| $\gamma/^\circ$                               | 90.00                                                         |
| Volume/ $\text{\AA}^3$                        | 4035.5(13)                                                    |
| Z                                             | 8                                                             |
| $\rho_{\text{calc}}/\text{cm}^3$              | 1.573                                                         |
| $\mu/\text{mm}^{-1}$                          | 0.850                                                         |
| F(000)                                        | 1936.0                                                        |
| Crystal size/ $\text{mm}^3$                   | $0.2 \times 0.2 \times 0.2$                                   |
| Radiation                                     | $\text{MoK}\alpha$ ( $\lambda = 0.71073$ )                    |
| $2\theta$ range for data collection/ $^\circ$ | 2.14 to 50                                                    |
| Index ranges                                  | $-14 \leq h \leq 14, -10 \leq k \leq 10, -45 \leq l \leq 45$  |
| Reflections collected                         | 13996                                                         |
| Independent reflections                       | 3545 [ $R_{\text{int}} = 0.1323, R_{\text{sigma}} = 0.0805$ ] |
| Data/restraints/parameters                    | 3545/0/235                                                    |
| Goodness-of-fit on $F^2$                      | 1.148                                                         |
| Final R indexes [ $I \geq 2\sigma(I)$ ]       | $R_1 = 0.0534, wR_2 = 0.1351$                                 |
| Final R indexes [all data]                    | $R_1 = 0.0596, wR_2 = 0.1390$                                 |
| Largest diff. peak/hole / $e \text{\AA}^{-3}$ | 0.52/-0.33                                                    |

**Table 2 Fractional Atomic Coordinates ( $\times 10^4$ ) and Equivalent Isotropic Displacement Parameters ( $\text{\AA}^2 \times 10^3$ ) for 3i.  $U_{\text{eq}}$  is defined as 1/3 of the trace of the orthogonalised  $U_{ij}$  tensor.**

| Atom | x          | y          | z          | U(eq)   |
|------|------------|------------|------------|---------|
| S2   | 3287.9(6)  | 5267.9(9)  | 3774.7(2)  | 37.0(2) |
| Cl2  | 6107.3(7)  | 9765.9(10) | 2910.0(2)  | 50.9(3) |
| P1   | 4309.5(7)  | 3801.6(10) | 4068.0(2)  | 39.3(2) |
| S1   | 4971.6(7)  | 2116.8(10) | 3750.5(3)  | 49.0(3) |
| Cl3  | 1185.4(10) | 7028.9(11) | 5423.7(3)  | 62.8(3) |
| S3   | 3187.4(10) | 2547.4(10) | 4340.7(3)  | 56.7(3) |
| Cl1  | 1241.2(9)  | -553.0(13) | 2743.1(3)  | 65.2(3) |
| O1   | 5204(2)    | 4557(3)    | 4270.9(7)  | 59.6(8) |
| C7   | 4204(2)    | 6410(3)    | 3533.8(8)  | 30.1(6) |
| C10  | 5389(2)    | 8422(3)    | 3150.9(8)  | 33.5(7) |
| C8   | 3936(3)    | 6636(3)    | 3180.3(8)  | 35.1(7) |
| C12  | 5094(3)    | 7172(3)    | 3693.7(8)  | 36.1(7) |
| C9   | 4517(3)    | 7666(4)    | 2988.7(8)  | 37.4(7) |
| C11  | 5693(3)    | 8165(4)    | 3496.9(9)  | 38.5(7) |
| C1   | 3839(3)    | 1446(4)    | 3479.9(9)  | 39.4(8) |
| C16  | 1778(3)    | 5880(4)    | 5109.1(9)  | 42.7(8) |
| C13  | 2676(3)    | 3970(4)    | 4631.1(8)  | 42.0(8) |
| C2   | 3167(3)    | 285(4)     | 3594.1(9)  | 41.1(8) |
| C3   | 2351(3)    | -300(4)    | 3371.6(10) | 44.8(9) |
| C4   | 2228(3)    | 251(4)     | 3032.7(10) | 43.3(8) |
| C18  | 3249(3)    | 4311(4)    | 4943.3(9)  | 44.8(8) |
| C6   | 3686(3)    | 2018(4)    | 3138.3(9)  | 44.7(8) |
| C5   | 2887(3)    | 1419(4)    | 2913.8(10) | 46.3(9) |
| C15  | 1212(3)    | 5579(4)    | 4795.5(9)  | 46.7(8) |
| C14  | 1665(3)    | 4619(4)    | 4555.8(9)  | 46.7(9) |
| C17  | 2802(3)    | 5274(4)    | 5185.2(9)  | 45.5(9) |

**Table 3 Anisotropic Displacement Parameters ( $\text{\AA}^2 \times 10^3$ ) for 3i. The Anisotropic displacement factor exponent takes the form:  $-2\pi^2[h^2a^{*2}U_{11}+2hka^*b^*U_{12}+\dots]$ .**

| <b>Atom</b> | <b><math>U_{11}</math></b> | <b><math>U_{22}</math></b> | <b><math>U_{33}</math></b> | <b><math>U_{23}</math></b> | <b><math>U_{13}</math></b> | <b><math>U_{12}</math></b> |
|-------------|----------------------------|----------------------------|----------------------------|----------------------------|----------------------------|----------------------------|
| S2          | 27.4(4)                    | 40.0(4)                    | 43.3(5)                    | 5.4(3)                     | 0.4(3)                     | -8.9(3)                    |
| Cl2         | 43.9(6)                    | 53.2(5)                    | 56.7(6)                    | 13.6(4)                    | 11.6(4)                    | -12.8(4)                   |
| P1          | 39.3(5)                    | 38.8(5)                    | 39.2(5)                    | 7.3(3)                     | -3.0(4)                    | -8.2(4)                    |
| S1          | 33.7(5)                    | 51.7(5)                    | 61.7(6)                    | 0.6(4)                     | 4.0(4)                     | 0.9(4)                     |
| Cl3         | 78.2(8)                    | 57.3(6)                    | 55.2(6)                    | -10.3(4)                   | 24.3(5)                    | -20.7(5)                   |
| S3          | 80.9(8)                    | 37.8(5)                    | 53.6(6)                    | 4.5(4)                     | 25.6(5)                    | -13.5(5)                   |
| Cl1         | 51.1(6)                    | 73.7(7)                    | 70.0(7)                    | -22.9(5)                   | -3.5(5)                    | 1.0(5)                     |
| O1          | 60.9(19)                   | 57.8(16)                   | 57.3(17)                   | 8.5(12)                    | -25.5(14)                  | -12.4(13)                  |
| C7          | 25.9(16)                   | 26.9(14)                   | 37.5(17)                   | -1.3(12)                   | 1.5(12)                    | -1.9(11)                   |
| C10         | 27.4(16)                   | 33.8(15)                   | 40.2(18)                   | 3.3(13)                    | 9.5(13)                    | -1.9(12)                   |
| C8          | 29.4(17)                   | 38.2(17)                   | 37.2(17)                   | -7.2(13)                   | -2.9(13)                   | -5.8(13)                   |
| C12         | 36.0(18)                   | 39.0(17)                   | 32.6(17)                   | 0.1(13)                    | -3.9(13)                   | -7.0(13)                   |
| C9          | 36.6(19)                   | 44.3(17)                   | 31.5(17)                   | 0.5(13)                    | 3.4(13)                    | -3.7(14)                   |
| C11         | 29.3(18)                   | 38.0(16)                   | 48(2)                      | -0.3(14)                   | -0.9(14)                   | -9.0(13)                   |
| C1          | 35.3(18)                   | 36.0(17)                   | 47.5(19)                   | -3.0(14)                   | 7.4(14)                    | 4.4(14)                    |
| C16         | 54(2)                      | 39.5(17)                   | 35.3(18)                   | 5.1(14)                    | 7.0(15)                    | -18.4(16)                  |
| C13         | 55(2)                      | 37.6(17)                   | 34.1(18)                   | 5.7(13)                    | 8.2(15)                    | -16.3(16)                  |
| C2          | 42(2)                      | 37.6(17)                   | 44(2)                      | 4.3(14)                    | 7.9(15)                    | 4.6(15)                    |
| C3          | 41(2)                      | 34.3(17)                   | 60(2)                      | -2.4(15)                   | 15.4(17)                   | -0.5(14)                   |
| C4          | 36.7(19)                   | 39.7(17)                   | 53(2)                      | -11.5(15)                  | 3.7(16)                    | 7.4(14)                    |
| C18         | 44(2)                      | 47.8(19)                   | 42(2)                      | 17.4(16)                   | -3.6(15)                   | -7.3(16)                   |
| C6          | 46(2)                      | 37.7(17)                   | 51(2)                      | 4.9(15)                    | 12.8(17)                   | -0.7(15)                   |
| C5          | 53(2)                      | 43.0(19)                   | 44(2)                      | 1.8(15)                    | 8.2(17)                    | 9.4(16)                    |
| C15         | 39(2)                      | 57(2)                      | 44(2)                      | 3.8(16)                    | 3.1(15)                    | -11.5(16)                  |
| C14         | 46(2)                      | 59(2)                      | 35.0(19)                   | 2.2(15)                    | -4.8(15)                   | -18.7(17)                  |
| C17         | 53(2)                      | 49(2)                      | 33.5(18)                   | 8.7(15)                    | -4.8(16)                   | -20.0(17)                  |

**Table 4 Bond Lengths for 3i.**

| <b>Ato<br/>m</b> | <b>Ato<br/>m</b> | <b>Length/Å</b> | <b>Ato<br/>m</b> | <b>Ato<br/>m</b> | <b>Length/Å</b> |
|------------------|------------------|-----------------|------------------|------------------|-----------------|
| S2               | P1               | 2.0711(12)      | C8               | C9               | 1.374(4)        |
| S2               | C7               | 1.785(3)        | C12              | C11              | 1.377(4)        |
| Cl2              | C10              | 1.747(3)        | C1               | C2               | 1.386(5)        |
| P1               | S1               | 2.0850(13)      | C1               | C6               | 1.392(5)        |
| P1               | S3               | 2.0721(12)      | C16              | C15              | 1.373(5)        |
| P1               | O1               | 1.464(3)        | C16              | C17              | 1.379(5)        |
| S1               | C1               | 1.783(4)        | C13              | C18              | 1.380(5)        |
| Cl3              | C16              | 1.742(4)        | C13              | C14              | 1.380(5)        |
| S3               | C13              | 1.789(4)        | C2               | C3               | 1.374(5)        |
| Cl1              | C4               | 1.740(4)        | C3               | C4               | 1.374(5)        |
| C7               | C8               | 1.380(4)        | C4               | C5               | 1.386(5)        |
| C7               | C12              | 1.389(4)        | C18              | C17              | 1.376(5)        |
| C10              | C9               | 1.375(5)        | C6               | C5               | 1.369(5)        |
| C10              | C11              | 1.366(5)        | C15              | C14              | 1.371(5)        |

**Table 5 Bond Angles for 3i.**

| <b>Ato<br/>m</b> | <b>Ato<br/>m</b> | <b>Ato<br/>m</b> | <b>Angle/°</b> |
|------------------|------------------|------------------|----------------|
| C7               | S2               | P1               | 103.69(11)     |
| S2               | P1               | S1               | 111.25(5)      |
| S2               | P1               | S3               | 101.06(6)      |
| S3               | P1               | S1               | 102.04(5)      |
| O1               | P1               | S2               | 115.18(11)     |
| O1               | P1               | S1               | 108.34(13)     |
| O1               | P1               | S3               | 118.14(12)     |
| C1               | S1               | P1               | 104.30(11)     |
| C13              | S3               | P1               | 102.00(11)     |
| C8               | C7               | S2               | 116.8(2)       |
| C8               | C7               | C12              | 120.1(3)       |
| C12              | C7               | S2               | 122.8(2)       |
| C9               | C10              | C12              | 119.1(2)       |
| C11              | C10              | C12              | 119.5(2)       |
| C11              | C10              | C9               | 121.5(3)       |
| C9               | C8               | C7               | 120.2(3)       |
| C11              | C12              | C7               | 119.3(3)       |
| C8               | C9               | C10              | 119.1(3)       |
| C10              | C11              | C12              | 119.8(3)       |
| C2               | C1               | S1               | 121.1(3)       |

| <b>Ato<br/>m</b> | <b>Ato<br/>m</b> | <b>Ato<br/>m</b> | <b>Angle/°</b> |
|------------------|------------------|------------------|----------------|
| C2               | C1               | C6               | 119.7(3)       |
| C6               | C1               | S1               | 119.0(3)       |
| C15              | C16              | C13              | 119.6(3)       |
| C15              | C16              | C17              | 121.7(3)       |
| C17              | C16              | C13              | 118.8(3)       |
| C18              | C13              | S3               | 119.9(3)       |
| C18              | C13              | C14              | 120.3(3)       |
| C14              | C13              | S3               | 119.6(3)       |
| C3               | C2               | C1               | 120.2(3)       |
| C2               | C3               | C4               | 119.3(3)       |
| C3               | C4               | C11              | 119.5(3)       |
| C3               | C4               | C5               | 121.4(3)       |
| C5               | C4               | C11              | 119.1(3)       |
| C17              | C18              | C13              | 120.0(3)       |
| C5               | C6               | C1               | 120.2(3)       |
| C6               | C5               | C4               | 119.1(3)       |
| C14              | C15              | C16              | 119.2(4)       |
| C15              | C14              | C13              | 120.0(3)       |
| C18              | C17              | C16              | 118.8(3)       |



**Table 6 Hydrogen Atom Coordinates ( $\text{\AA}\times 10^4$ ) and Isotropic Displacement Parameters ( $\text{\AA}^2\times 10^3$ ) for 3i.**

| <b>Atom</b> | <b>x</b> | <b>y</b> | <b>z</b> | <b>U(eq)</b> |
|-------------|----------|----------|----------|--------------|
| H8          | 3361     | 6089     | 3071     | 42           |
| H12         | 5283     | 7012     | 3931     | 43           |
| H9          | 4322     | 7849     | 2752     | 45           |
| H11         | 6302     | 8660     | 3599     | 46           |
| H2          | 3268     | -100     | 3822     | 49           |
| H3          | 1887     | -1061    | 3450     | 54           |
| H18         | 3938     | 3889     | 4990     | 54           |
| H6          | 4128     | 2810     | 3062     | 54           |
| H5          | 2787     | 1791     | 2685     | 56           |
| H15         | 530      | 6020     | 4746     | 56           |
| H14         | 1290     | 4406     | 4342     | 56           |
| H17         | 3183     | 5513     | 5396     | 55           |
